# Supplementary material for: Synthesis, Structures and Chemical Reactivity of Dithiolato-Bridged Ni-Fe Complexes as Biomimetics for the Active Site of [NiFe]-Hydrogenases
Source: MDPI journal article supplement (doi:10.3390/inorganics10070090), 2022-06-24

## checkCIF/PLATON report

You have not supplied any structure factors. As a result the full set of tests cannot be run.

THIS REPORT IS FOR GUIDANCE ONLY. IF USED AS PART OF A REVIEW PROCEDURE FOR PUBLICATION, IT SHOULD NOT REPLACE THE EXPERTISE OF AN EXPERIENCED CRYSTALLOGRAPHIC REFEREE.

No syntax errors found.      CIF dictionary      Interpreting this report

### Datablock: ComplexA

---

Bond precision:    C-C = 0.0078 Å                      Wavelength=1.54184

Cell:                      a=13.5359(5)                      b=13.9046(4)                      c=19.5358(7)  
                              alpha=101.369(3)                      beta=92.861(3)                      gamma=114.983(3)  
Temperature:    137 K

|                        | Calculated                                   | Reported                         |
|------------------------|----------------------------------------------|----------------------------------|
| Volume                 | 3230.5(2)                                    | 3230.6(2)                        |
| Space group            | P -1                                         | P -1                             |
| Hall group             | -P 1                                         | -P 1                             |
| Moiety formula         | C61 H52 Fe Ni O2 P4 S2, 2(B F4), 2(C H2 Cl2) | ?                                |
| Sum formula            | C63 H56 B2 Cl4 F8 Fe Ni O2 P4 S2             | C63 H56 B2 Cl4 F8 Fe Ni O2 P4 S2 |
| Mr                     | 1463.04                                      | 1463.05                          |
| Dx, g cm <sup>-3</sup> | 1.504                                        | 1.504                            |
| Z                      | 2                                            | 2                                |
| Mu (mm <sup>-1</sup> ) | 5.792                                        | 5.792                            |
| F000                   | 1492.0                                       | 1492.0                           |
| F000'                  | 1493.99                                      |                                  |
| h, k, lmax             | 16, 17, 24                                   | 16, 16, 23                       |
| Nref                   | 13126                                        | 11539                            |
| Tmin, Tmax             | 0.482, 0.499                                 | 0.586, 1.000                     |
| Tmin'                  | 0.365                                        |                                  |

Correction method= # Reported T Limits: Tmin=0.586 Tmax=1.000

AbsCorr = MULTII-SCAN

Data completeness= 0.879

Theta(max)= 74.066

R(reflections)= 0.0622( 9672)

wR2(reflections)=  
0.1706( 11539)

S = 1.028

Npar= 807

The following ALERTS were generated. Each ALERT has the format

**test-name\_ALERT\_alert-type\_alert-level.**

Click on the hyperlinks for more details of the test.

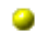

### Alert level C

DIFMX02\_ALERT\_1\_C The maximum difference density is > 0.1\*ZMAX\*0.75

The relevant atom site should be identified.

|                   |                                                 |              |
|-------------------|-------------------------------------------------|--------------|
| PLAT097_ALERT_2_C | Large Reported Max. (Positive) Residual Density | 2.15 eA-3    |
| PLAT220_ALERT_2_C | NonSolvent Resd 1 C Ueq(max)/Ueq(min) Range     | 3.4 Ratio    |
| PLAT244_ALERT_4_C | Low 'Solvent' Ueq as Compared to Neighbors of   | B1 Check     |
| PLAT244_ALERT_4_C | Low 'Solvent' Ueq as Compared to Neighbors of   | B2 Check     |
| PLAT341_ALERT_3_C | Low Bond Precision on C-C Bonds .....           | 0.00782 Ang. |
| PLAT430_ALERT_2_C | Short Inter D...A Contact 01 ..01 .             | 2.88 Ang.    |
|                   | 1-x,-y,1-z =                                    | 2_656 Check  |

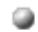

### Alert level G

|                   |                                                  |              |
|-------------------|--------------------------------------------------|--------------|
| PLAT002_ALERT_2_G | Number of Distance or Angle Restraints on AtSite | 16 Note      |
| PLAT003_ALERT_2_G | Number of Uiso or Uij Restrained non-H Atoms ... | 15 Report    |
| PLAT083_ALERT_2_G | SHELXL Second Parameter in WGHT Unusually Large  | 9.33 Why ?   |
| PLAT154_ALERT_1_G | The s.u.'s on the Cell Angles are Equal ..(Note) | 0.003 Degree |
| PLAT171_ALERT_4_G | The CIF-Embedded .res File Contains EADP Records | 7 Report     |
| PLAT172_ALERT_4_G | The CIF-Embedded .res File Contains DFIX Records | 2 Report     |
| PLAT176_ALERT_4_G | The CIF-Embedded .res File Contains SADI Records | 2 Report     |
| PLAT186_ALERT_4_G | The CIF-Embedded .res File Contains ISOR Records | 2 Report     |
| PLAT231_ALERT_4_G | Hirshfeld Test (Solvent) F1 --B1 .               | 11.7 s.u.    |
| PLAT231_ALERT_4_G | Hirshfeld Test (Solvent) F2 --B1 .               | 26.0 s.u.    |
| PLAT231_ALERT_4_G | Hirshfeld Test (Solvent) F4 --B1 .               | 10.2 s.u.    |
| PLAT231_ALERT_4_G | Hirshfeld Test (Solvent) F1' --B1 .              | 24.2 s.u.    |
| PLAT231_ALERT_4_G | Hirshfeld Test (Solvent) F2' --B1 .              | 13.0 s.u.    |
| PLAT231_ALERT_4_G | Hirshfeld Test (Solvent) F3' --B1 .              | 14.2 s.u.    |
| PLAT231_ALERT_4_G | Hirshfeld Test (Solvent) F4' --B1 .              | 5.7 s.u.     |
| PLAT231_ALERT_4_G | Hirshfeld Test (Solvent) F5 --B2 .               | 8.5 s.u.     |
| PLAT231_ALERT_4_G | Hirshfeld Test (Solvent) F6 --B2 .               | 11.0 s.u.    |
| PLAT231_ALERT_4_G | Hirshfeld Test (Solvent) F7 --B2 .               | 7.7 s.u.     |
| PLAT231_ALERT_4_G | Hirshfeld Test (Solvent) F5' --B2 .              | 14.2 s.u.    |
| PLAT231_ALERT_4_G | Hirshfeld Test (Solvent) F6' --B2 .              | 6.2 s.u.     |
| PLAT231_ALERT_4_G | Hirshfeld Test (Solvent) F7' --B2 .              | 9.2 s.u.     |
| PLAT232_ALERT_2_G | Hirshfeld Test Diff (M-X) Fe1 --C1 .             | 6.5 s.u.     |
| PLAT232_ALERT_2_G | Hirshfeld Test Diff (M-X) Fe1 --C2 .             | 7.5 s.u.     |
| PLAT302_ALERT_4_G | Anion/Solvent/Minor-Residue Disorder (Resd 2 )   | 80% Note     |
| PLAT302_ALERT_4_G | Anion/Solvent/Minor-Residue Disorder (Resd 3 )   | 60% Note     |
| PLAT432_ALERT_2_G | Short Inter X...Y Contact F4 ..C12 .             | 2.83 Ang.    |
|                   | x,y,z =                                          | 1_555 Check  |
| PLAT432_ALERT_2_G | Short Inter X...Y Contact F3' ..C46 .            | 2.72 Ang.    |
|                   | x,y,z =                                          | 1_555 Check  |
| PLAT767_ALERT_4_G | INS Embedded LIST 6 Instruction Should be LIST 4 | Please Check |
| PLAT860_ALERT_3_G | Number of Least-Squares Restraints .....         | 134 Note     |
| PLAT933_ALERT_2_G | Number of HKL-OMIT Records in Embedded .res File | 11 Note      |
| PLAT941_ALERT_3_G | Average HKL Measurement Multiplicity .....       | 2.0 Low      |

---

0 **ALERT level A** = Most likely a serious problem - resolve or explain  
 0 **ALERT level B** = A potentially serious problem, consider carefully  
 7 **ALERT level C** = Check. Ensure it is not caused by an omission or oversight  
 31 **ALERT level G** = General information/check it is not something unexpected

2 ALERT type 1 CIF construction/syntax error, inconsistent or missing data  
 11 ALERT type 2 Indicator that the structure model may be wrong or deficient  
 3 ALERT type 3 Indicator that the structure quality may be low  
 22 ALERT type 4 Improvement, methodology, query or suggestion  
 0 ALERT type 5 Informative message, check

---

## Datablock: Complex1

---

|                        |                                                  |                                      |
|------------------------|--------------------------------------------------|--------------------------------------|
| Bond precision:        | C-C = 0.0049 A                                   | Wavelength=1.54184                   |
| Cell:                  | a=12.16469(13)                                   | b=23.5596(3) c=20.6266(2)            |
|                        | alpha=90                                         | beta=90.0624(9) gamma=90             |
| Temperature:           | 152 K                                            |                                      |
|                        | Calculated                                       | Reported                             |
| Volume                 | 5911.48(11)                                      | 5911.48(11)                          |
| Space group            | P 21/n                                           | P 21/n                               |
| Hall group             | -P 2yn                                           | -P 2yn                               |
| Moiety formula         | C61 H52 Fe N Ni O P4 S2, B<br>F4, C H2 Cl2, H2 O | ?                                    |
| Sum formula            | C62 H56 B Cl2 F4 Fe N Ni O2<br>P4 S2             | C62 H56 B Cl2 F4 Fe N Ni O2<br>P4 S2 |
| Mr                     | 1307.33                                          | 1307.34                              |
| Dx, g cm <sup>-3</sup> | 1.469                                            | 1.469                                |
| Z                      | 4                                                | 4                                    |
| Mu (mm <sup>-1</sup> ) | 5.354                                            | 5.354                                |
| F000                   | 2688.0                                           | 2688.0                               |
| F000'                  | 2687.85                                          |                                      |
| h, k, lmax             | 14, 28, 24                                       | 14, 28, 24                           |
| Nref                   | 10577                                            | 10570                                |
| Tmin, Tmax             | 0.446, 0.526                                     | 0.364, 1.000                         |
| Tmin'                  | 0.404                                            |                                      |

Correction method= # Reported T Limits: Tmin=0.364 Tmax=1.000  
 AbsCorr = MULTI-SCAN

Data completeness= 0.999                      Theta(max)= 67.076

R(reflections)= 0.0425( 8969)

wR2(reflections)=  
0.1099( 10570)

S = 1.019

Npar= 729

The following ALERTS were generated. Each ALERT has the format

**test-name\_ALERT\_alert-type\_alert-level.**

Click on the hyperlinks for more details of the test.



#### Alert level C

|                   |            |           |                                 |                         |     |       |
|-------------------|------------|-----------|---------------------------------|-------------------------|-----|-------|
| PLAT220_ALERT_2_C | NonSolvent | Resd 1    | C                               | Ueq(max)/Ueq(min) Range | 3.5 | Ratio |
| PLAT244_ALERT_4_C | Low        | 'Solvent' | Ueq as Compared to Neighbors of |                         | C3  | Check |

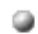

#### Alert level G

|                   |                                                  |           |                                 |   |         |        |
|-------------------|--------------------------------------------------|-----------|---------------------------------|---|---------|--------|
| PLAT002_ALERT_2_G | Number of Distance or Angle Restraints on AtSite |           |                                 |   | 3       | Note   |
| PLAT003_ALERT_2_G | Number of Uiso or Uij Restrained non-H Atoms ... |           |                                 |   | 1       | Report |
| PLAT083_ALERT_2_G | SHELXL Second Parameter in WGHT Unusually Large  |           |                                 |   | 5.89    | Why ?  |
| PLAT143_ALERT_4_G | s.u. on c - Axis Small or Missing .....          |           |                                 |   | 0.00020 | Ang.   |
| PLAT172_ALERT_4_G | The CIF-Embedded .res File Contains DFIX Records |           |                                 |   | 2       | Report |
| PLAT186_ALERT_4_G | The CIF-Embedded .res File Contains ISOR Records |           |                                 |   | 1       | Report |
| PLAT232_ALERT_2_G | Hirshfeld Test Diff (M-X)                        | Nil       | --S1                            | . | 5.0     | s.u.   |
| PLAT232_ALERT_2_G | Hirshfeld Test Diff (M-X)                        | Fel       | --C1                            | . | 5.9     | s.u.   |
| PLAT232_ALERT_2_G | Hirshfeld Test Diff (M-X)                        | Fel       | --C2                            | . | 6.2     | s.u.   |
| PLAT244_ALERT_4_G | Low                                              | 'Solvent' | Ueq as Compared to Neighbors of |   | B1      | Check  |
| PLAT860_ALERT_3_G | Number of Least-Squares Restraints .....         |           |                                 |   | 9       | Note   |
| PLAT933_ALERT_2_G | Number of HKL-OMIT Records in Embedded .res File |           |                                 |   | 6       | Note   |
| PLAT941_ALERT_3_G | Average HKL Measurement Multiplicity .....       |           |                                 |   | 3.8     | Low    |

- 
- 0 **ALERT level A** = Most likely a serious problem - resolve or explain  
0 **ALERT level B** = A potentially serious problem, consider carefully  
2 **ALERT level C** = Check. Ensure it is not caused by an omission or oversight  
13 **ALERT level G** = General information/check it is not something unexpected
- 0 ALERT type 1 CIF construction/syntax error, inconsistent or missing data  
8 ALERT type 2 Indicator that the structure model may be wrong or deficient  
2 ALERT type 3 Indicator that the structure quality may be low  
5 ALERT type 4 Improvement, methodology, query or suggestion  
0 ALERT type 5 Informative message, check
- 

## Datablock: Complex2

---

Bond precision: C-C = 0.0136 A

Wavelength=1.54184

|              |                 |                |                 |
|--------------|-----------------|----------------|-----------------|
| Cell:        | a=13.6077(9)    | b=13.8784(10)  | c=20.6526(15)   |
|              | alpha=70.414(7) | beta=87.819(6) | gamma=74.103(6) |
| Temperature: | 152 K           |                |                 |

|                        | Calculated                                   | Reported                        |
|------------------------|----------------------------------------------|---------------------------------|
| Volume                 | 3527.9(5)                                    | 3527.9(5)                       |
| Space group            | P -1                                         | P -1                            |
| Hall group             | -P 1                                         | -P 1                            |
| Moiety formula         | C61 H52 Fe N Ni O P4 S3, B<br>F4 [+ solvent] | ?                               |
| Sum formula            | C61 H52 B F4 Fe N Ni O P4<br>S3 [+ solvent]  | C61 H52 B F4 Fe N Ni O P4<br>S3 |
| Mr                     | 1236.45                                      | 1236.46                         |
| Dx, g cm <sup>-3</sup> | 1.164                                        | 1.164                           |
| Z                      | 2                                            | 2                               |
| Mu (mm <sup>-1</sup> ) | 4.037                                        | 4.037                           |
| F000                   | 1272.0                                       | 1272.0                          |
| F000'                  | 1270.98                                      |                                 |
| h,k,lmax               | 16,16,24                                     | 16,16,24                        |
| Nref                   | 12601                                        | 12095                           |
| Tmin,Tmax              | 0.573,0.592                                  | 0.584,1.000                     |
| Tmin'                  | 0.520                                        |                                 |

Correction method= # Reported T Limits: Tmin=0.584 Tmax=1.000  
AbsCorr = MULTI-SCAN

Data completeness= 0.960                      Theta(max)= 67.072

R(reflections)= 0.0790( 6503)                      wR2(reflections)=  
0.2390( 12095)  
S = 0.880                      Npar= 695

The following ALERTS were generated. Each ALERT has the format  
**test-name\_ALERT\_alert-type\_alert-level.**  
Click on the hyperlinks for more details of the test.

### Alert level C

|                   |                                                |           |       |       |           |
|-------------------|------------------------------------------------|-----------|-------|-------|-----------|
| PLAT029_ALERT_3_C | _diffrn_measured_fraction_theta_full           | value Low | .     | 0.960 | Why?      |
| PLAT230_ALERT_2_C | Hirshfeld Test Diff for                        | P2        | --C14 | .     | 6.7 s.u.  |
| PLAT230_ALERT_2_C | Hirshfeld Test Diff for                        | P4        | --C49 | .     | 5.5 s.u.  |
| PLAT234_ALERT_4_C | Large Hirshfeld Difference                     | C39       | --C40 | .     | 0.17 Ang. |
| PLAT234_ALERT_4_C | Large Hirshfeld Difference                     | C40       | --C41 | .     | 0.16 Ang. |
| PLAT234_ALERT_4_C | Large Hirshfeld Difference                     | C53       | --C54 | .     | 0.17 Ang. |
| PLAT234_ALERT_4_C | Large Hirshfeld Difference                     | C56       | --C61 | .     | 0.16 Ang. |
| PLAT241_ALERT_2_C | High 'MainMol' Ueq as Compared to Neighbors of |           |       | C37   | Check     |
| PLAT241_ALERT_2_C | High 'MainMol' Ueq as Compared to Neighbors of |           |       | C40   | Check     |
| PLAT241_ALERT_2_C | High 'MainMol' Ueq as Compared to Neighbors of |           |       | C44   | Check     |
| PLAT242_ALERT_2_C | Low 'MainMol' Ueq as Compared to Neighbors of  |           |       | C36   | Check     |
| PLAT242_ALERT_2_C | Low 'MainMol' Ueq as Compared to Neighbors of  |           |       | C39   | Check     |
| PLAT242_ALERT_2_C | Low 'MainMol' Ueq as Compared to Neighbors of  |           |       | C42   | Check     |
| PLAT260_ALERT_2_C | Large Average Ueq of Residue Including         |           | F1    | 0.126 | Check     |

|                   |                                       |       |   |             |
|-------------------|---------------------------------------|-------|---|-------------|
| PLAT331_ALERT_2_C | Small Aver Phenyl C-C Dist C36        | --C41 | . | 1.36 Ang.   |
| PLAT331_ALERT_2_C | Small Aver Phenyl C-C Dist C42        | --C47 | . | 1.37 Ang.   |
| PLAT341_ALERT_3_C | Low Bond Precision on C-C Bonds ..... |       |   | 0.0136 Ang. |

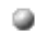

### Alert level G

|                   |                                                  |     |              |
|-------------------|--------------------------------------------------|-----|--------------|
| PLAT003_ALERT_2_G | Number of Uiso or Uij Restrained non-H Atoms ... | 15  | Report       |
| PLAT177_ALERT_4_G | The CIF-Embedded .res File Contains DELU Records | 4   | Report       |
| PLAT186_ALERT_4_G | The CIF-Embedded .res File Contains ISOR Records | 4   | Report       |
| PLAT244_ALERT_4_G | Low 'Solvent' Ueq as Compared to Neighbors of    | B1  | Check        |
| PLAT606_ALERT_4_G | Solvent Accessible VOID(S) in Structure .....    | !   | Info         |
| PLAT860_ALERT_3_G | Number of Least-Squares Restraints .....         | 64  | Note         |
| PLAT869_ALERT_4_G | ALERTS Related to the Use of SQUEEZE Suppressed  | !   | Info         |
| PLAT933_ALERT_2_G | Number of HKL-OMIT Records in Embedded .res File | 495 | Note         |
| PLAT941_ALERT_3_G | Average HKL Measurement Multiplicity .....       | 1.9 | Low          |
| PLAT965_ALERT_2_G | The SHELXL WEIGHT Optimisation has not Converged |     | Please Check |

- 
- 0 **ALERT level A** = Most likely a serious problem - resolve or explain
  - 0 **ALERT level B** = A potentially serious problem, consider carefully
  - 17 **ALERT level C** = Check. Ensure it is not caused by an omission or oversight
  - 10 **ALERT level G** = General information/check it is not something unexpected
  
  - 0 ALERT type 1 CIF construction/syntax error, inconsistent or missing data
  - 14 ALERT type 2 Indicator that the structure model may be wrong or deficient
  - 4 ALERT type 3 Indicator that the structure quality may be low
  - 9 ALERT type 4 Improvement, methodology, query or suggestion
  - 0 ALERT type 5 Informative message, check
- 

## Datablock: Complex4

---

|                 |                  |                                  |
|-----------------|------------------|----------------------------------|
| Bond precision: | C-C = 0.0089 A   | Wavelength=1.54184               |
| Cell:           | a=10.4504 (3)    | b=17.3852 (6) c=17.3954 (6)      |
|                 | alpha=85.080 (3) | beta=81.056 (3) gamma=75.973 (3) |
| Temperature:    | 100 K            |                                  |

|                        | Calculated                                | Reported                      |
|------------------------|-------------------------------------------|-------------------------------|
| Volume                 | 3025.10(18)                               | 3025.10(18)                   |
| Space group            | P -1                                      | P -1                          |
| Hall group             | -P 1                                      | -P 1                          |
| Moiety formula         | C57 H54 Fe N Ni O P4 S2, B F4, 2(C3 H6 O) | ?                             |
| Sum formula            | C63 H66 B F4 Fe N Ni O3 P4 S2             | C63 H66 B F4 Fe N Ni O3 P4 S2 |
| Mr                     | 1274.52                                   | 1274.53                       |
| Dx, g cm <sup>-3</sup> | 1.399                                     | 1.399                         |
| Z                      | 2                                         | 2                             |
| Mu (mm <sup>-1</sup> ) | 4.433                                     | 4.433                         |
| F000                   | 1324.0                                    | 1324.0                        |
| F000'                  | 1322.56                                   |                               |
| h,k,lmax               | 12,20,20                                  | 12,20,20                      |
| Nref                   | 10812                                     | 10804                         |
| Tmin,Tmax              | 0.517,0.587                               | 0.426,1.000                   |
| Tmin'                  | 0.469                                     |                               |

Correction method= # Reported T Limits: Tmin=0.426 Tmax=1.000  
AbsCorr = MULTI-SCAN

Data completeness= 0.999                      Theta(max)= 67.077

R(reflections)= 0.0705( 8495)                      wR2(reflections)=  
0.1968( 10804)  
S = 1.039                      Npar= 726

The following ALERTS were generated. Each ALERT has the format  
**test-name\_ALERT\_alert-type\_alert-level.**  
Click on the hyperlinks for more details of the test.

#### Alert level C

|                                                                  |                             |              |
|------------------------------------------------------------------|-----------------------------|--------------|
| PLAT213_ALERT_2_C Atom C23                                       | has ADP max/min Ratio ..... | 3.2 prolat   |
| PLAT220_ALERT_2_C NonSolvent Resd 1 C                            | Ueq(max)/Ueq(min) Range     | 3.5 Ratio    |
| PLAT230_ALERT_2_C Hirshfeld Test Diff for N1                     | --C43                       | 7.0 s.u.     |
| PLAT241_ALERT_2_C High 'MainMol' Ueq as Compared to Neighbors of |                             | C23 Check    |
| PLAT244_ALERT_4_C Low 'Solvent' Ueq as Compared to Neighbors of  |                             | C61 Check    |
| PLAT244_ALERT_4_C Low 'Solvent' Ueq as Compared to Neighbors of  |                             | C58 Check    |
| PLAT341_ALERT_3_C Low Bond Precision on C-C Bonds .....          |                             | 0.00887 Ang. |

#### Alert level G

|                                                                    |  |              |
|--------------------------------------------------------------------|--|--------------|
| PLAT003_ALERT_2_G Number of Uiso or Uij Restrained non-H Atoms ... |  | 2 Report     |
| PLAT083_ALERT_2_G SHELXL Second Parameter in WGHT Unusually Large  |  | 6.25 Why ?   |
| PLAT154_ALERT_1_G The s.u.'s on the Cell Angles are Equal ..(Note) |  | 0.003 Degree |
| PLAT186_ALERT_4_G The CIF-Embedded .res File Contains ISOR Records |  | 1 Report     |

|                   |                                               |                                 |       |   |           |
|-------------------|-----------------------------------------------|---------------------------------|-------|---|-----------|
| PLAT232_ALERT_2_G | Hirshfeld Test Diff (M-X)                     | Fe1                             | --S1  | . | 5.0 s.u.  |
| PLAT232_ALERT_2_G | Hirshfeld Test Diff (M-X)                     | Fe1                             | --C1  | . | 6.0 s.u.  |
| PLAT244_ALERT_4_G | Low 'Solvent' Ueq as Compared to Neighbors of |                                 |       |   | B1 Check  |
| PLAT343_ALERT_2_G | Unusual sp?                                   | Angle Range in Main Residue for |       |   | C27 Check |
| PLAT367_ALERT_2_G | Long? C(sp?)-C(sp?) Bond                      | C27                             | - C28 | . | 1.53 Ang. |
| PLAT860_ALERT_3_G | Number of Least-Squares Restraints            | .....                           |       |   | 12 Note   |
| PLAT941_ALERT_3_G | Average HKL Measurement Multiplicity          | .....                           |       |   | 1.9 Low   |

---

0 **ALERT level A** = Most likely a serious problem - resolve or explain  
 0 **ALERT level B** = A potentially serious problem, consider carefully  
 7 **ALERT level C** = Check. Ensure it is not caused by an omission or oversight  
 11 **ALERT level G** = General information/check it is not something unexpected

1 ALERT type 1 CIF construction/syntax error, inconsistent or missing data  
 10 ALERT type 2 Indicator that the structure model may be wrong or deficient  
 3 ALERT type 3 Indicator that the structure quality may be low  
 4 ALERT type 4 Improvement, methodology, query or suggestion  
 0 ALERT type 5 Informative message, check

---

## Datablock: Complex5

---

|                 |                                                              |                                 |
|-----------------|--------------------------------------------------------------|---------------------------------|
| Bond precision: | C-C = 0.0067 A                                               | Wavelength=1.54184              |
| Cell:           | a=26.3215 (7)                                                | b=26.3215 (7) c=19.6548 (5)     |
|                 | alpha=90                                                     | beta=90 gamma=120               |
| Temperature:    | 293 K                                                        |                                 |
|                 | Calculated                                                   | Reported                        |
| Volume          | 11792.9 (7)                                                  | 11792.9 (7)                     |
| Space group     | P -3                                                         | P -3                            |
| Hall group      | -P 3                                                         | -P 3                            |
| Moiety formula  | C62 H58 Fe N Ni O P4 S3,<br>0.5(C6 H14), B F4 [+<br>solvent] | ?                               |
| Sum formula     | C65 H65 B F4 Fe N Ni O P4<br>S3 [+ solvent]                  | C65 H65 B F4 Fe N Ni O P4<br>S3 |
| Mr              | 1297.59                                                      | 1297.61                         |
| Dx, g cm-3      | 1.096                                                        | 1.096                           |
| Z               | 6                                                            | 6                               |
| Mu (mm-1)       | 3.642                                                        | 3.642                           |
| F000            | 4038.0                                                       | 4038.0                          |
| F000'           | 4035.34                                                      |                                 |
| h, k, lmax      | 32, 32, 24                                                   | 31, 31, 24                      |
| Nref            | 15964                                                        | 15472                           |
| Tmin, Tmax      | 0.489, 0.501                                                 | 0.496, 1.000                    |
| Tmin'           | 0.443                                                        |                                 |



Correction method= # Reported T Limits: Tmin=0.496 Tmax=1.000  
AbsCorr = MULTI-SCAN

Data completeness= 0.969

Theta(max)= 74.028

R(reflections)= 0.0689( 12139)

wR2(reflections)=  
0.1981( 15472)

S = 0.903

Npar= 787

---

The following ALERTS were generated. Each ALERT has the format

**test-name\_ALERT\_alert-type\_alert-level.**

Click on the hyperlinks for more details of the test.

---

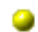

### Alert level C

|                   |                                                  |         |              |
|-------------------|--------------------------------------------------|---------|--------------|
| PLAT094_ALERT_2_C | Ratio of Maximum / Minimum Residual Density .... | 2.18    | Report       |
| PLAT214_ALERT_2_C | Atom B3 (Anion/Solvent) ADP max/min Ratio        | 4.8     | prolat       |
| PLAT260_ALERT_2_C | Large Average Ueq of Residue Including C63       | 0.132   | Check        |
| PLAT260_ALERT_2_C | Large Average Ueq of Residue Including F5        | 0.121   | Check        |
| PLAT341_ALERT_3_C | Low Bond Precision on C-C Bonds .....            | 0.00667 | Ang.         |
| PLAT410_ALERT_2_C | Short Intra H...H Contact H4 ..H31A .            | 1.98    | Ang.         |
|                   | x,y,z =                                          | 1_555   | Check        |
| PLAT420_ALERT_2_C | D-H Bond Without Acceptor S3 --H3 .              |         | Please Check |

---

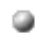

### Alert level G

|                   |                                                  |     |        |
|-------------------|--------------------------------------------------|-----|--------|
| PLAT002_ALERT_2_G | Number of Distance or Angle Restraints on AtSite | 11  | Note   |
| PLAT003_ALERT_2_G | Number of Uiso or Uij Restrained non-H Atoms ... | 10  | Report |
| PLAT007_ALERT_5_G | Number of Unrefined Donor-H Atoms .....          | 1   | Report |
| PLAT172_ALERT_4_G | The CIF-Embedded .res File Contains DFIX Records | 1   | Report |
| PLAT176_ALERT_4_G | The CIF-Embedded .res File Contains SADI Records | 3   | Report |
| PLAT178_ALERT_4_G | The CIF-Embedded .res File Contains SIMU Records | 2   | Report |
| PLAT199_ALERT_1_G | Reported _cell_measurement_temperature ..... (K) | 293 | Check  |
| PLAT200_ALERT_1_G | Reported _diffrn_ambient_temperature ..... (K)   | 293 | Check  |
| PLAT232_ALERT_2_G | Hirshfeld Test Diff (M-X) Nil --S1 .             | 5.6 | s.u.   |
| PLAT232_ALERT_2_G | Hirshfeld Test Diff (M-X) Fe1 --S2 .             | 5.2 | s.u.   |
| PLAT232_ALERT_2_G | Hirshfeld Test Diff (M-X) Fe1 --C1 .             | 6.7 | s.u.   |
| PLAT244_ALERT_4_G | Low 'Solvent' Ueq as Compared to Neighbors of    | B2  | Check  |
| PLAT300_ALERT_4_G | Atom Site Occupancy of C63 Constrained at        | 0.5 | Check  |
| PLAT300_ALERT_4_G | Atom Site Occupancy of C64 Constrained at        | 0.5 | Check  |
| PLAT300_ALERT_4_G | Atom Site Occupancy of C65 Constrained at        | 0.5 | Check  |
| PLAT300_ALERT_4_G | Atom Site Occupancy of C66 Constrained at        | 0.5 | Check  |
| PLAT300_ALERT_4_G | Atom Site Occupancy of C67 Constrained at        | 0.5 | Check  |
| PLAT300_ALERT_4_G | Atom Site Occupancy of C68 Constrained at        | 0.5 | Check  |
| PLAT300_ALERT_4_G | Atom Site Occupancy of H63A Constrained at       | 0.5 | Check  |
| PLAT300_ALERT_4_G | Atom Site Occupancy of H63B Constrained at       | 0.5 | Check  |
| PLAT300_ALERT_4_G | Atom Site Occupancy of H63C Constrained at       | 0.5 | Check  |
| PLAT300_ALERT_4_G | Atom Site Occupancy of H64A Constrained at       | 0.5 | Check  |
| PLAT300_ALERT_4_G | Atom Site Occupancy of H64B Constrained at       | 0.5 | Check  |
| PLAT300_ALERT_4_G | Atom Site Occupancy of H65A Constrained at       | 0.5 | Check  |
| PLAT300_ALERT_4_G | Atom Site Occupancy of H65B Constrained at       | 0.5 | Check  |
| PLAT300_ALERT_4_G | Atom Site Occupancy of H66A Constrained at       | 0.5 | Check  |
| PLAT300_ALERT_4_G | Atom Site Occupancy of H66B Constrained at       | 0.5 | Check  |

|                                                                    |                |        |              |
|--------------------------------------------------------------------|----------------|--------|--------------|
| PLAT300_ALERT_4_G Atom Site Occupancy of H67A                      | Constrained at | 0.5    | Check        |
| PLAT300_ALERT_4_G Atom Site Occupancy of H67B                      | Constrained at | 0.5    | Check        |
| PLAT300_ALERT_4_G Atom Site Occupancy of H68A                      | Constrained at | 0.5    | Check        |
| PLAT300_ALERT_4_G Atom Site Occupancy of H68B                      | Constrained at | 0.5    | Check        |
| PLAT300_ALERT_4_G Atom Site Occupancy of H68C                      | Constrained at | 0.5    | Check        |
| PLAT300_ALERT_4_G Atom Site Occupancy of F5                        | Constrained at | 0.3333 | Check        |
| PLAT300_ALERT_4_G Atom Site Occupancy of F6                        | Constrained at | 0.3333 | Check        |
| PLAT300_ALERT_4_G Atom Site Occupancy of F7                        | Constrained at | 0.3333 | Check        |
| PLAT300_ALERT_4_G Atom Site Occupancy of F8                        | Constrained at | 0.3333 | Check        |
| PLAT300_ALERT_4_G Atom Site Occupancy of B3                        | Constrained at | 0.3333 | Check        |
| PLAT302_ALERT_4_G Anion/Solvent/Minor-Residue Disorder (Resd 2 )   |                | 100%   | Note         |
| PLAT302_ALERT_4_G Anion/Solvent/Minor-Residue Disorder (Resd 5 )   |                | 100%   | Note         |
| PLAT304_ALERT_4_G Non-Integer Number of Atoms in ..... (Resd 5 )   |                | 1.67   | Check        |
| PLAT606_ALERT_4_G Solvent Accessible VOID(S) in Structure .....    |                | !      | Info         |
| PLAT860_ALERT_3_G Number of Least-Squares Restraints .....         |                | 122    | Note         |
| PLAT869_ALERT_4_G ALERTS Related to the Use of SQUEEZE Suppressed  |                | !      | Info         |
| PLAT933_ALERT_2_G Number of HKL-OMIT Records in Embedded .res File |                | 29     | Note         |
| PLAT941_ALERT_3_G Average HKL Measurement Multiplicity .....       |                | 1.9    | Low          |
| PLAT965_ALERT_2_G The SHELXL WEIGHT Optimisation has not Converged |                |        | Please Check |

---

0 **ALERT level A** = Most likely a serious problem - resolve or explain  
 0 **ALERT level B** = A potentially serious problem, consider carefully  
 7 **ALERT level C** = Check. Ensure it is not caused by an omission or oversight  
 46 **ALERT level G** = General information/check it is not something unexpected

2 ALERT type 1 CIF construction/syntax error, inconsistent or missing data  
 13 ALERT type 2 Indicator that the structure model may be wrong or deficient  
 3 ALERT type 3 Indicator that the structure quality may be low  
 34 ALERT type 4 Improvement, methodology, query or suggestion  
 1 ALERT type 5 Informative message, check

---

## Datablock: ComplexD

---

Bond precision: C-C = 0.0063 A

Wavelength=0.71073

Cell: a=16.1180(9) b=24.5373(12) c=22.9864(14)  
 alpha=90 beta=108.562(2) gamma=90

Temperature: 113 K

|                   |                                                                                                                                                                                                          |             |
|-------------------|----------------------------------------------------------------------------------------------------------------------------------------------------------------------------------------------------------|-------------|
| ABSTY02_ALERT_1_C | An _exptl_absorpt_correction_type has been given without<br>a literature citation. This should be contained in the<br>_exptl_absorpt_process_details field.<br>Absorption correction given as Multi-scan |             |
| DENSD01_ALERT_1_C | The ratio of the submitted crystal density and that<br>calculated from the formula is outside the range 0.99 <> 1.01<br>Crystal density given = 1.412<br>Calculated crystal density = 1.363              |             |
| PLAT046_ALERT_1_C | Reported Z, MW and D(calc) are Inconsistent ....                                                                                                                                                         | 1.363 Check |
| PLAT243_ALERT_4_C | High 'Solvent' Ueq as Compared to Neighbors of                                                                                                                                                           | C72 Check   |
| PLAT244_ALERT_4_C | Low 'Solvent' Ueq as Compared to Neighbors of                                                                                                                                                            | C71 Check   |
| PLAT244_ALERT_4_C | Low 'Solvent' Ueq as Compared to Neighbors of                                                                                                                                                            | C74 Check   |
| PLAT260_ALERT_2_C | Large Average Ueq of Residue Including C11                                                                                                                                                               | 0.103 Check |

|                   |                                        |     |         |       |
|-------------------|----------------------------------------|-----|---------|-------|
| PLAT260_ALERT_2_C | Large Average Ueq of Residue Including | Cl3 | 0.169   | Check |
| PLAT260_ALERT_2_C | Large Average Ueq of Residue Including | Cl5 | 0.118   | Check |
| PLAT260_ALERT_2_C | Large Average Ueq of Residue Including | Cl7 | 0.157   | Check |
| PLAT341_ALERT_3_C | Low Bond Precision on C-C Bonds .....  |     | 0.00626 | Ang.  |

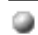

### Alert level G

|                   |                                                  |                 |       |              |
|-------------------|--------------------------------------------------|-----------------|-------|--------------|
| PLAT083_ALERT_2_G | SHELXL Second Parameter in WGHT                  | Unusually Large | 30.25 | Why ?        |
| PLAT232_ALERT_2_G | Hirshfeld Test Diff (M-X) Fe1                    | --C1            | 5.9   | s.u.         |
| PLAT232_ALERT_2_G | Hirshfeld Test Diff (M-X) Fe1                    | --C2            | 6.1   | s.u.         |
| PLAT244_ALERT_4_G | Low 'Solvent' Ueq as Compared to Neighbors of    |                 | B1    | Check        |
| PLAT244_ALERT_4_G | Low 'Solvent' Ueq as Compared to Neighbors of    |                 | B2    | Check        |
| PLAT480_ALERT_4_G | Long H...A H-Bond Reported H10                   | ..S1            | 2.96  | Ang.         |
| PLAT480_ALERT_4_G | Long H...A H-Bond Reported H33                   | ..O1            | 2.61  | Ang.         |
| PLAT480_ALERT_4_G | Long H...A H-Bond Reported H72B                  | ..O1            | 2.64  | Ang.         |
| PLAT480_ALERT_4_G | Long H...A H-Bond Reported H73B                  | ..CL2           | 2.96  | Ang.         |
| PLAT480_ALERT_4_G | Long H...A H-Bond Reported H74B                  | ..F4            | 2.61  | Ang.         |
| PLAT480_ALERT_4_G | Long H...A H-Bond Reported H10                   | ..S1            | 2.96  | Ang.         |
| PLAT480_ALERT_4_G | Long H...A H-Bond Reported H33                   | ..O1            | 2.61  | Ang.         |
| PLAT480_ALERT_4_G | Long H...A H-Bond Reported H72B                  | ..O1            | 2.64  | Ang.         |
| PLAT480_ALERT_4_G | Long H...A H-Bond Reported H73B                  | ..CL2           | 2.96  | Ang.         |
| PLAT480_ALERT_4_G | Long H...A H-Bond Reported H74B                  | ..F4            | 2.61  | Ang.         |
| PLAT480_ALERT_4_G | Long H...A H-Bond Reported H10                   | ..S1            | 2.96  | Ang.         |
| PLAT480_ALERT_4_G | Long H...A H-Bond Reported H14                   | ..F2            | 2.64  | Ang.         |
| PLAT480_ALERT_4_G | Long H...A H-Bond Reported H33                   | ..O1            | 2.61  | Ang.         |
| PLAT480_ALERT_4_G | Long H...A H-Bond Reported H72B                  | ..O1            | 2.64  | Ang.         |
| PLAT480_ALERT_4_G | Long H...A H-Bond Reported H73B                  | ..CL2           | 2.96  | Ang.         |
| PLAT480_ALERT_4_G | Long H...A H-Bond Reported H74B                  | ..F4            | 2.61  | Ang.         |
| PLAT606_ALERT_4_G | Solvent Accessible VOID(S) in Structure .....    |                 | !     | Info         |
| PLAT869_ALERT_4_G | ALERTS Related to the Use of SQUEEZE             | Suppressed      | !     | Info         |
| PLAT941_ALERT_3_G | Average HKL Measurement Multiplicity .....       |                 | 4.9   | Low          |
| PLAT965_ALERT_2_G | The SHELXL WEIGHT Optimisation has not Converged |                 |       | Please Check |
| PLAT967_ALERT_5_G | Note: Two-Theta Cutoff Value in Embedded .res .. |                 | 50.0  | Degree       |

- 
- 0 **ALERT level A** = Most likely a serious problem - resolve or explain  
 0 **ALERT level B** = A potentially serious problem, consider carefully  
 11 **ALERT level C** = Check. Ensure it is not caused by an omission or oversight  
 26 **ALERT level G** = General information/check it is not something unexpected
- 3 ALERT type 1 CIF construction/syntax error, inconsistent or missing data  
 8 ALERT type 2 Indicator that the structure model may be wrong or deficient  
 2 ALERT type 3 Indicator that the structure quality may be low  
 23 ALERT type 4 Improvement, methodology, query or suggestion  
 1 ALERT type 5 Informative message, check
-

It is advisable to attempt to resolve as many as possible of the alerts in all categories. Often the minor alerts point to easily fixed oversights, errors and omissions in your CIF or refinement strategy, so attention to these fine details can be worthwhile. In order to resolve some of the more serious problems it may be necessary to carry out additional measurements or structure refinements. However, the purpose of your study may justify the reported deviations and the more serious of these should normally be commented upon in the discussion or experimental section of a paper or in the "special\_details" fields of the CIF. checkCIF was carefully designed to identify outliers and unusual parameters, but every test has its limitations and alerts that are not important in a particular case may appear. Conversely, the absence of alerts does not guarantee there are no aspects of the results needing attention. It is up to the individual to critically assess their own results and, if necessary, seek expert advice.

### **Publication of your CIF in IUCr journals**

A basic structural check has been run on your CIF. These basic checks will be run on all CIFs submitted for publication in IUCr journals (*Acta Crystallographica*, *Journal of Applied Crystallography*, *Journal of Synchrotron Radiation*); however, if you intend to submit to *Acta Crystallographica Section C* or *E* or *IUCrData*, you should make sure that full publication checks are run on the final version of your CIF prior to submission.

### **Publication of your CIF in other journals**

Please refer to the *Notes for Authors* of the relevant journal for any special instructions relating to CIF submission.

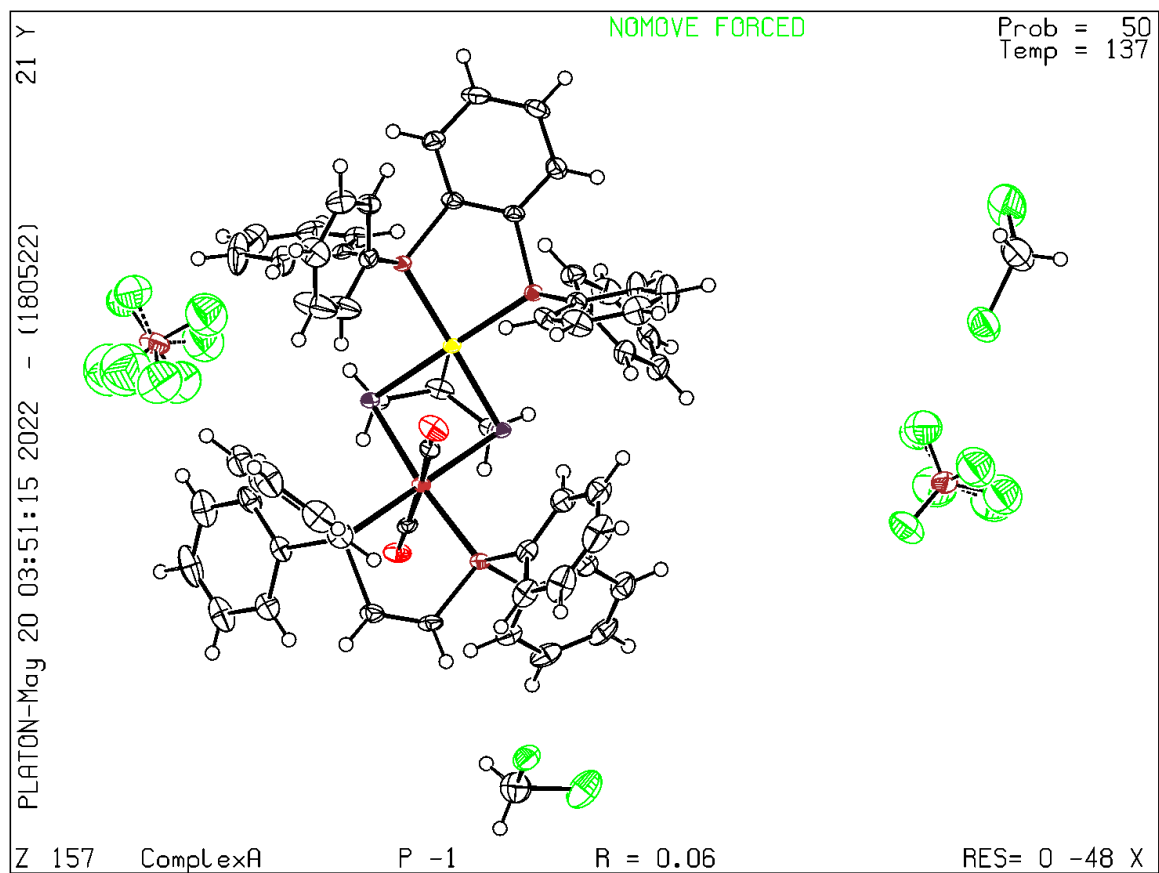

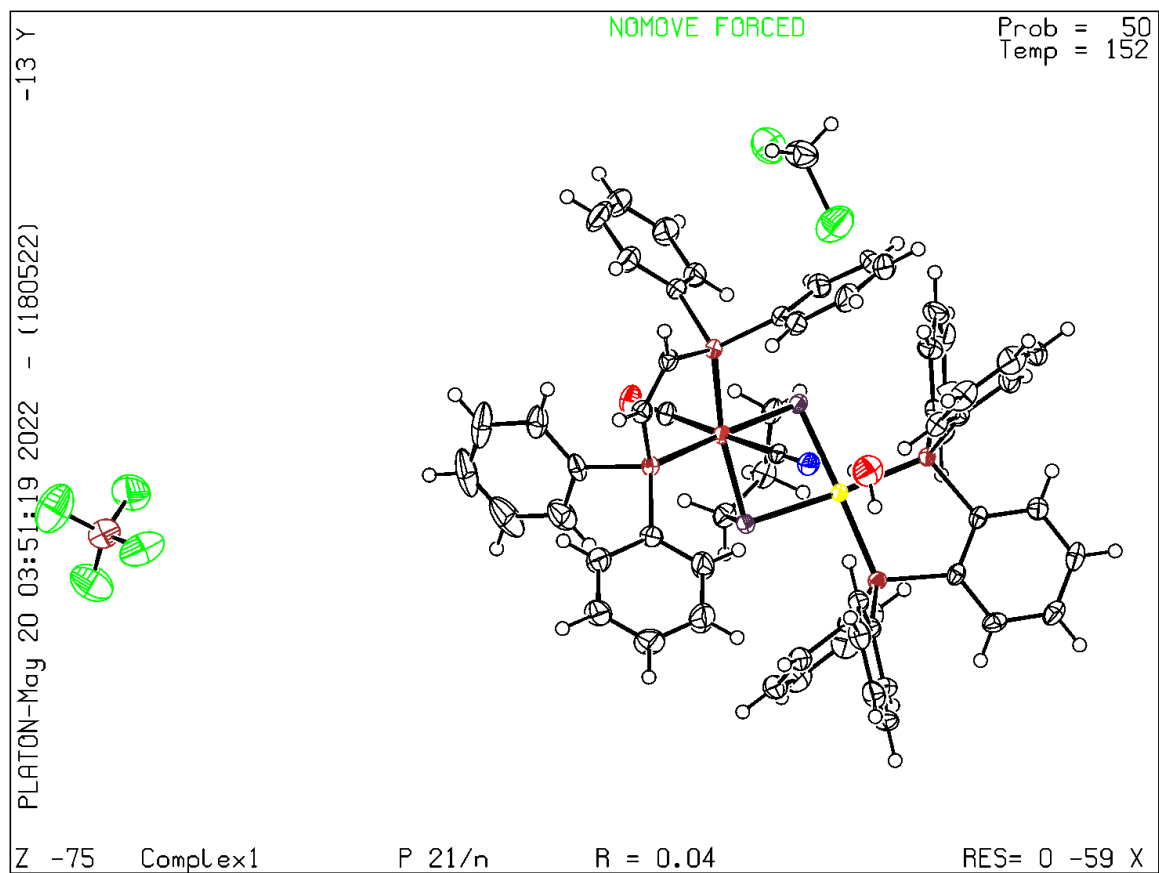

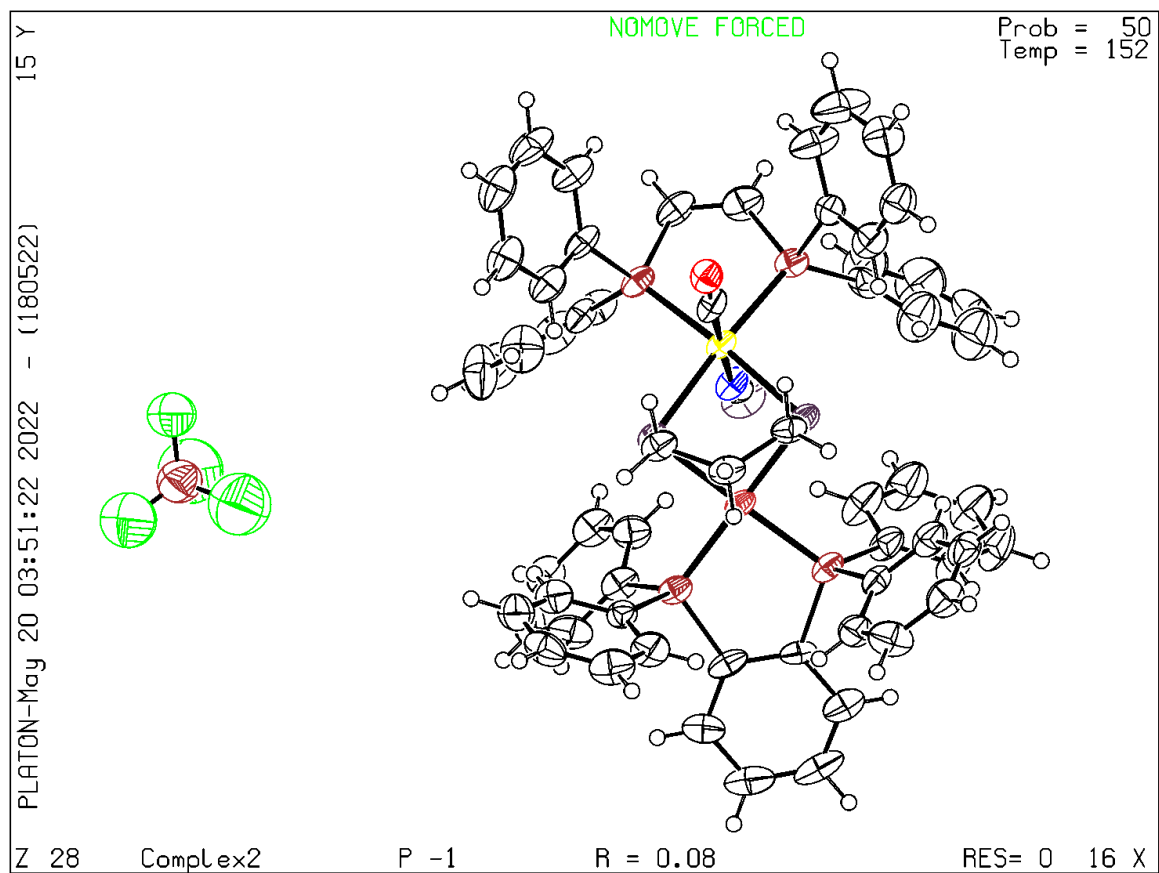



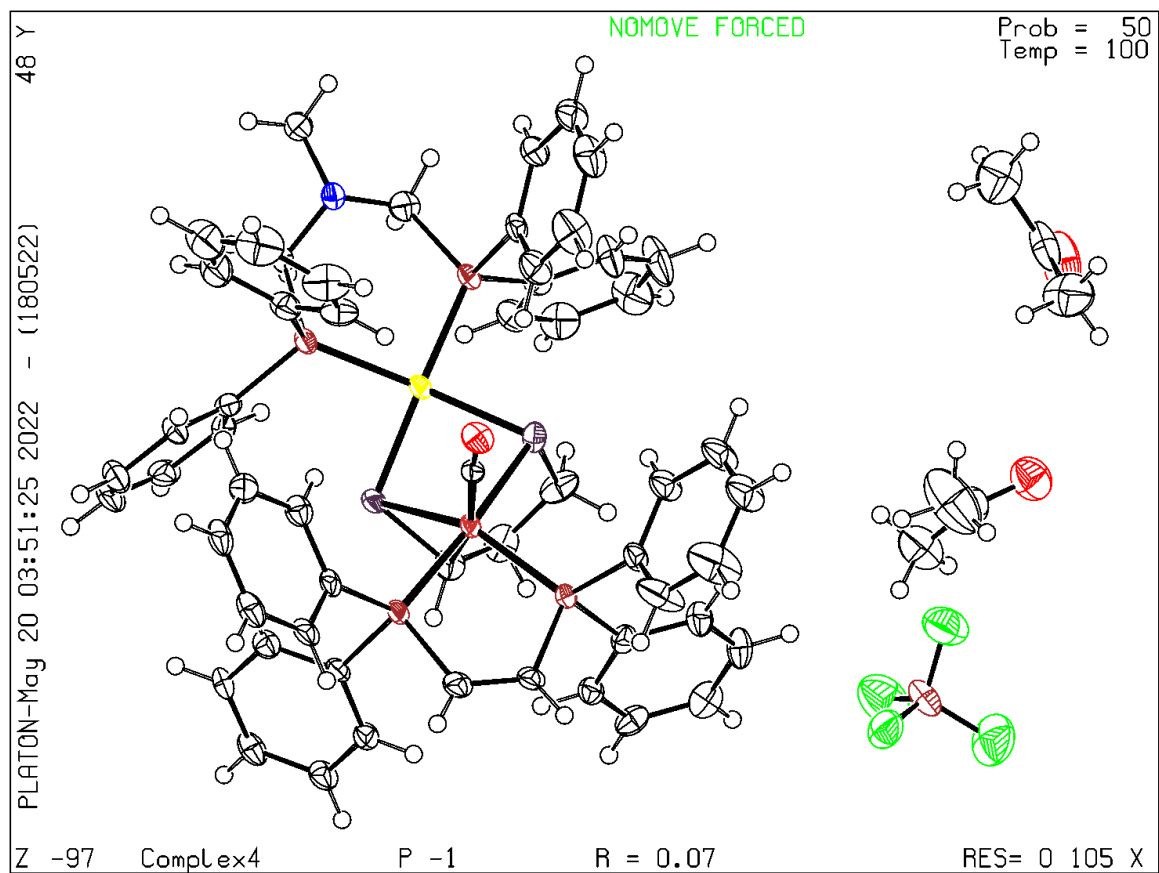

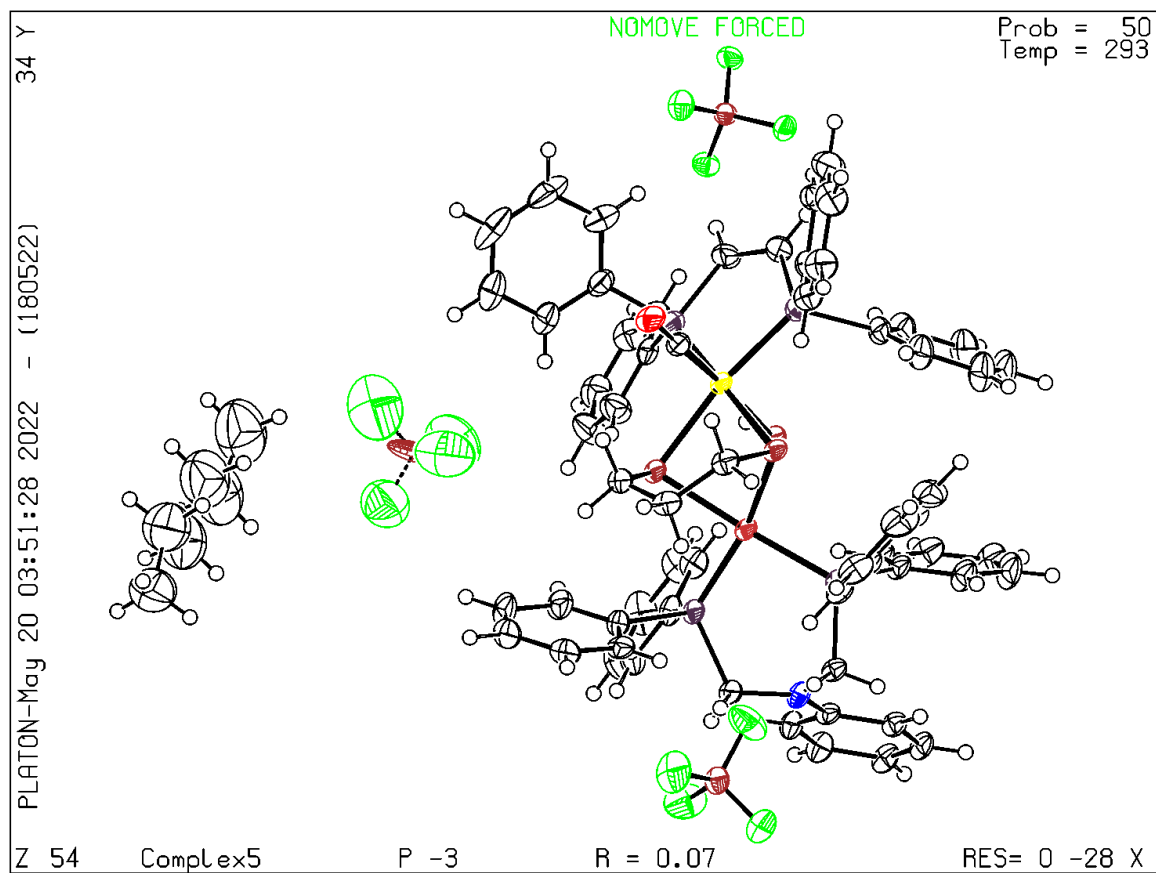

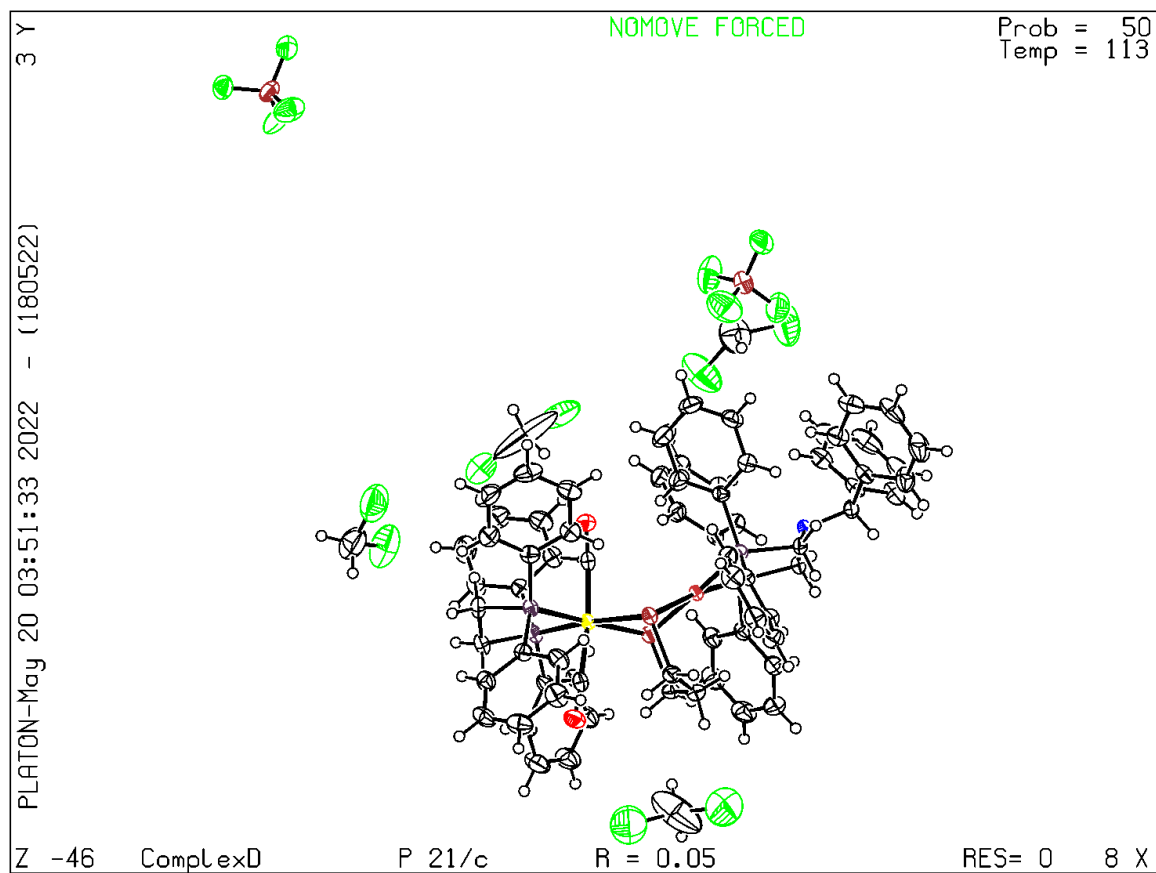

Supplement: s1 [file s1]
