# Supplementary material for: Synthesis, Structures and Chemical Reactivity of Dithiolato-Bridged Ni-Fe Complexes as Biomimetics for the Active Site of [NiFe]-Hydrogenases
Source: MDPI journal article supplement (doi:10.3390/inorganics10070090), 2022-06-24
Supplement: s1 [file s1]

## Supporting Information

### Synthesis, Structures and Chemical Reactivity of Dithiolato-Bridged Ni–Fe Complexes as Biomimetics for the Active Site of [NiFe]-Hydrogenases

Li-Cheng Song,\* Shuai Chen, Xiao-Feng Han, Zhen-Qing Zhang, Yin-Peng Wang, and Yi-Xiong Dong

Department of Chemistry, State Key Laboratory of Elemento-Organic Chemistry, College of Chemistry, Nankai University, Tianjin 300071, China

#### Contents:

1. IR and  $^1\text{H}$  ( $^{13}\text{C}$ ,  $^{31}\text{P}$ ) NMR spectra of  $[\text{A}](\text{BF}_4)_2$  (Figures S1–S4)
2. IR and  $^1\text{H}$  ( $^{13}\text{C}$ ,  $^{31}\text{P}$ ) NMR spectra of  $[1]\text{BF}_4$  (Figures S5–S8)
3. IR and  $^1\text{H}$  ( $^{13}\text{C}$ ,  $^{31}\text{P}$ ) NMR spectra of  $[2]\text{BF}_4$  (Figures S9–S12)
4. IR and  $^1\text{H}$  ( $^{13}\text{C}$ ,  $^{31}\text{P}$ ) NMR spectra of  $[3]\text{BF}_4$  (Figures S13–S16)
5. IR and  $^1\text{H}$  ( $^{13}\text{C}$ ,  $^{31}\text{P}$ ) NMR spectra of  $[4]\text{BF}_4$  (Figures S17–S20)
6. IR and  $^1\text{H}$  ( $^{13}\text{C}$ ,  $^{31}\text{P}$ ) NMR spectra of  $[5]\text{BF}_4$  (Figures S21–S24)
7. IR and  $^1\text{H}$  ( $^{13}\text{C}$ ,  $^{31}\text{P}$ ) NMR spectra of  $[\text{D}](\text{BF}_4)_2$  (Figures S25–S28)
8. IR and  $^1\text{H}$  ( $^{13}\text{C}$ ,  $^{31}\text{P}$ ) NMR spectra of  $[6]\text{BF}_4$  (Figures S29–S32)
9. Crystal data and structure refinement for  $[\text{A}](\text{BF}_4)_2$ ,  $[1]\text{BF}_4$ ,  $[2]\text{BF}_4$ ,  $[4]\text{BF}_4$ ,  $[5]\text{BF}_4$  and  $[\text{D}](\text{BF}_4)_2$  (Tables S1–S3)

# 1. IR and $^1\text{H}$ ( $^{13}\text{C}$ , $^{31}\text{P}$ ) NMR spectra of $[\text{A}](\text{BF}_4)_2$

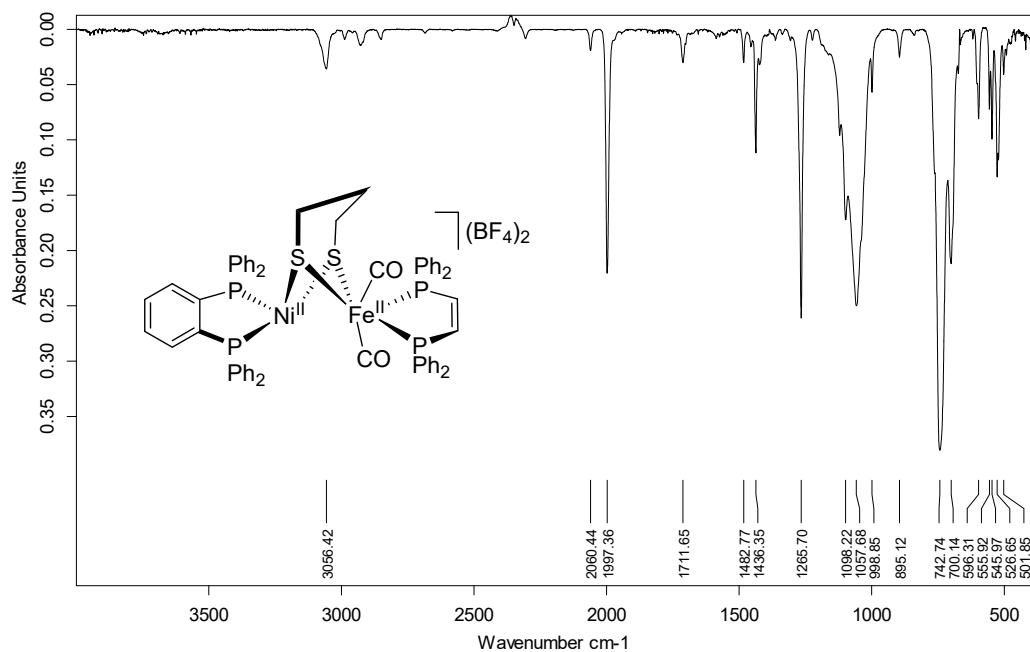

Figure S1. IR spectrum of  $[\text{A}](\text{BF}_4)_2$

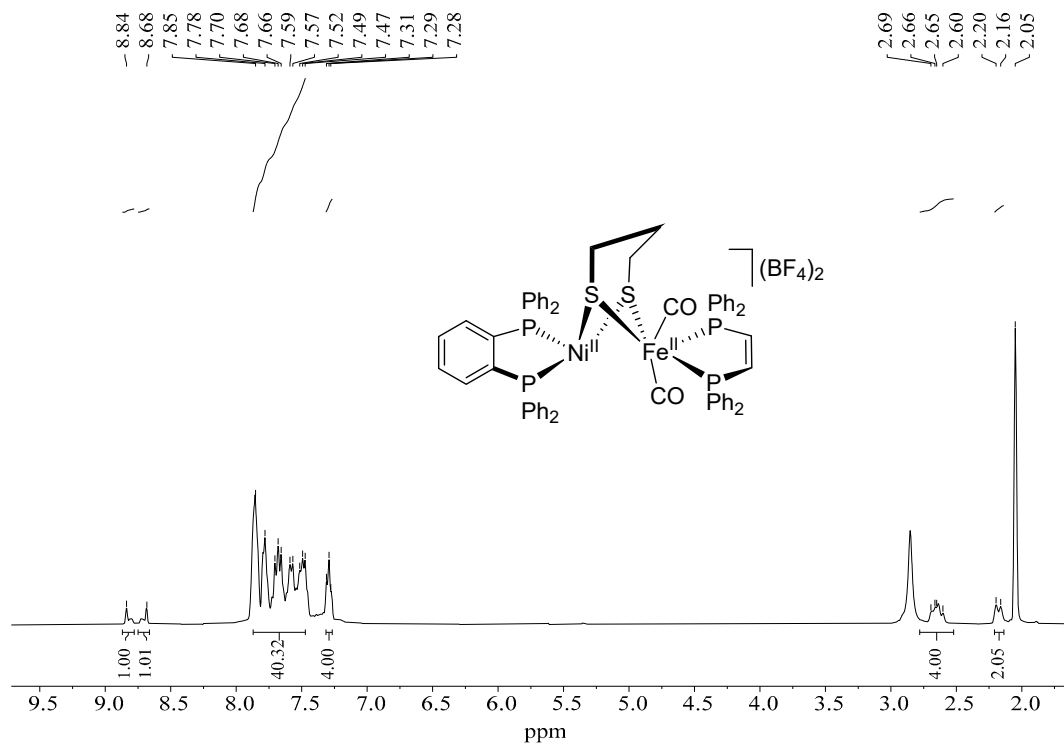

Figure S2.  $^1\text{H}$  NMR spectrum of  $[\text{A}](\text{BF}_4)_2$  in  $\text{acetone-}d_6$

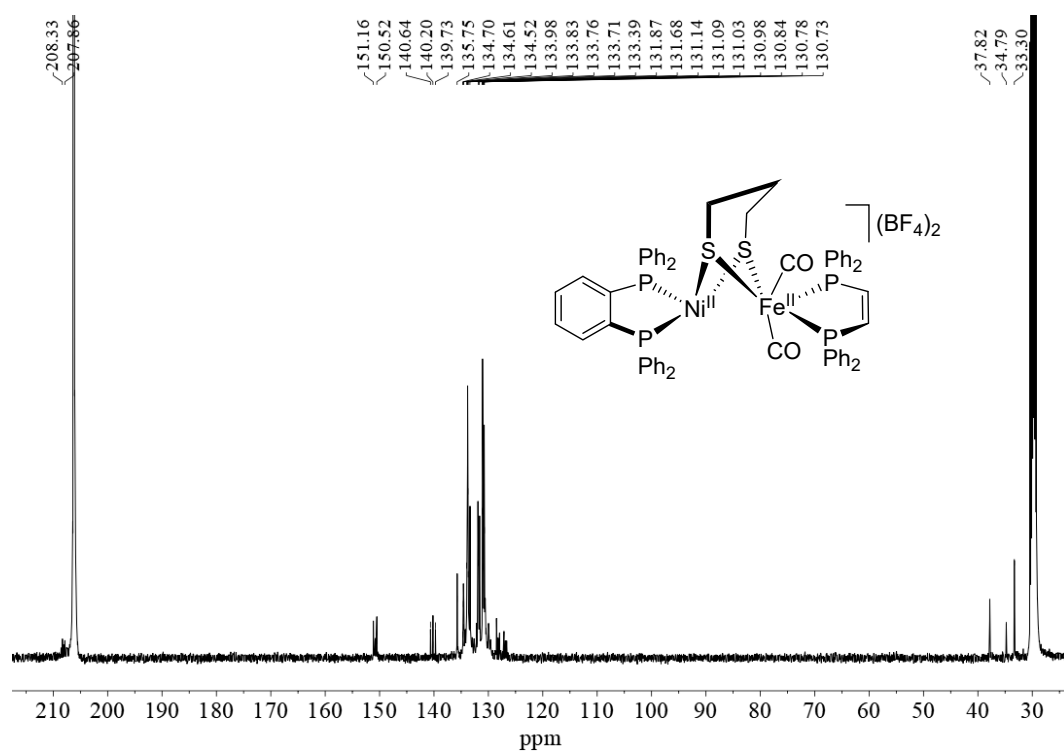

**Figure S3.**  $^{13}C$  NMR spectrum of  $[A](BF_4)_2$  in acetone- $d_6$

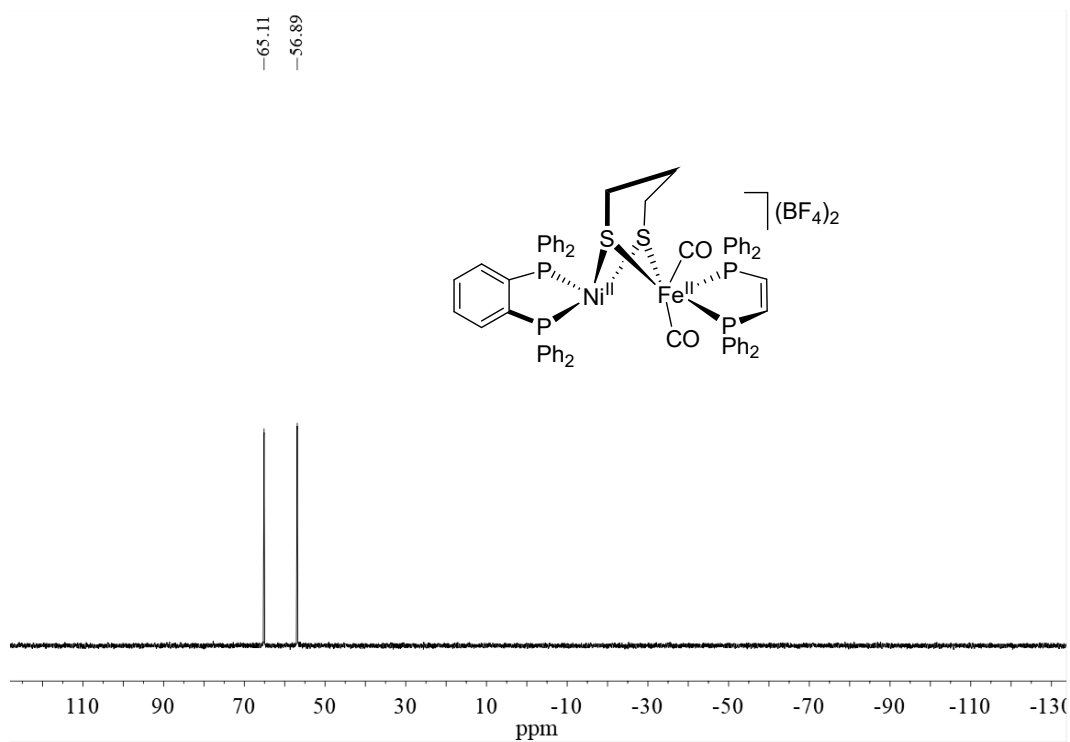

**Figure S4.**  $^{31}P$  NMR spectrum of  $[A](BF_4)_2$  in acetone- $d_6$

## 2. IR and $^1\text{H}$ ( $^{13}\text{C}$ , $^{31}\text{P}$ ) NMR spectra of $[1]\text{BF}_4$

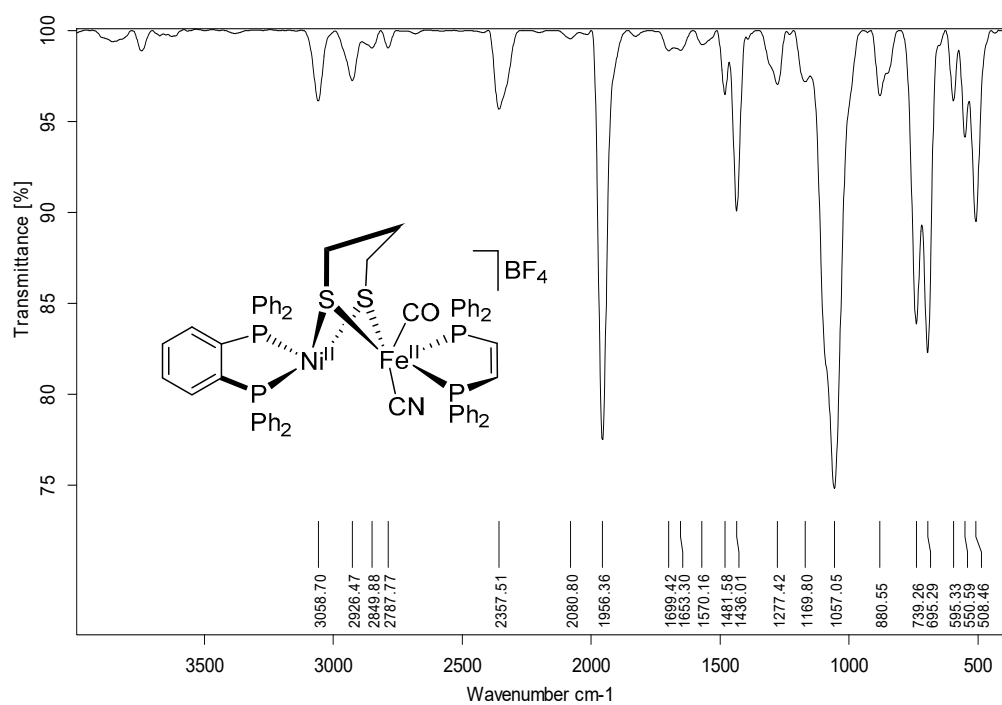

**Figure S5.** IR spectrum of  $[1]\text{BF}_4$

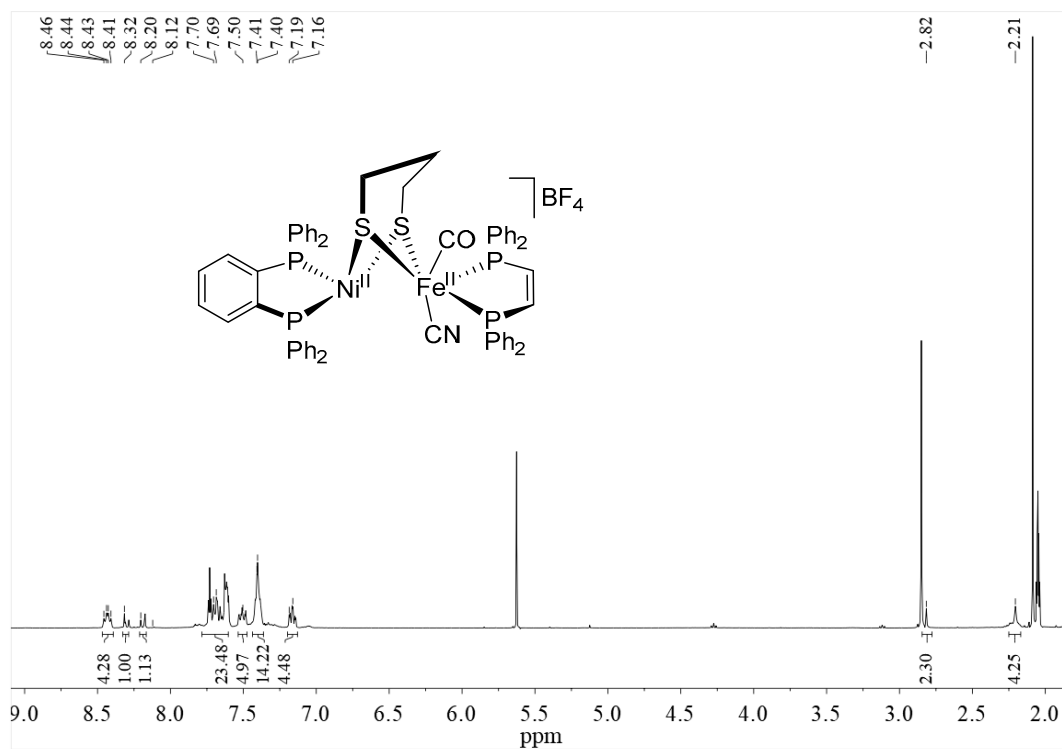

**Figure S6.**  $^1\text{H}$  NMR spectrum of  $[1]\text{BF}_4$  in  $\text{acetone-}d_6$

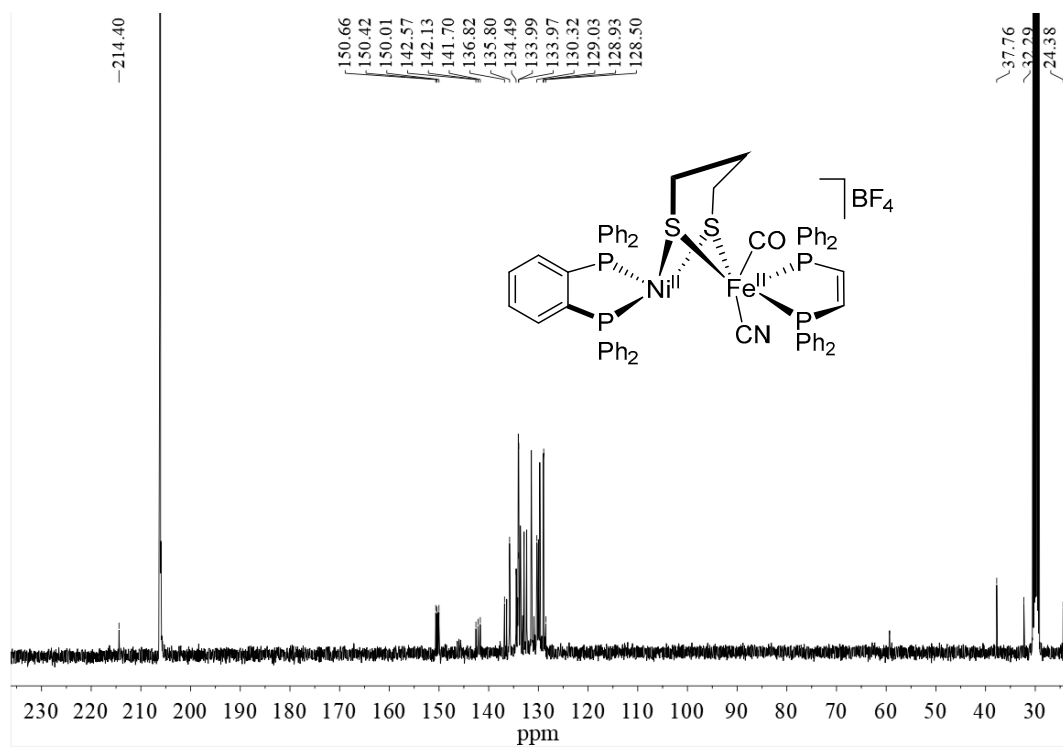

Figure S7. <sup>13</sup>C NMR spectrum of [1]BF<sub>4</sub> in acetone-*d*<sub>6</sub>

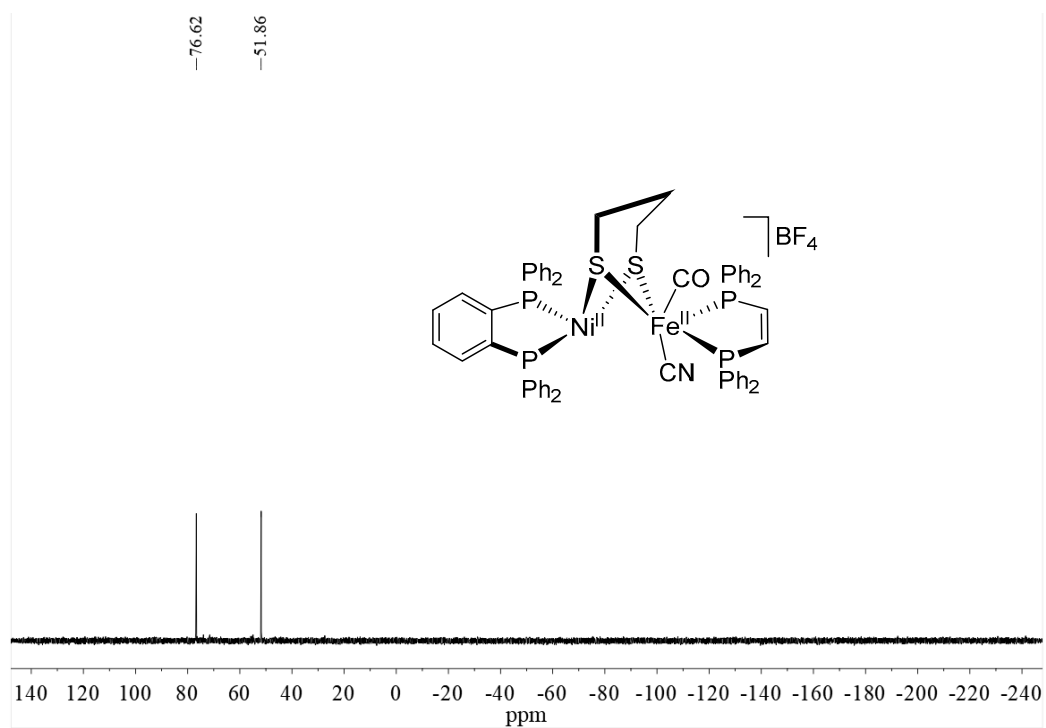

Figure S8. <sup>31</sup>P NMR spectrum of [1]BF<sub>4</sub> in acetone-*d*<sub>6</sub>

### 3. IR and $^1\text{H}$ ( $^{13}\text{C}$ , $^{31}\text{P}$ ) NMR spectra of $[2]\text{BF}_4$

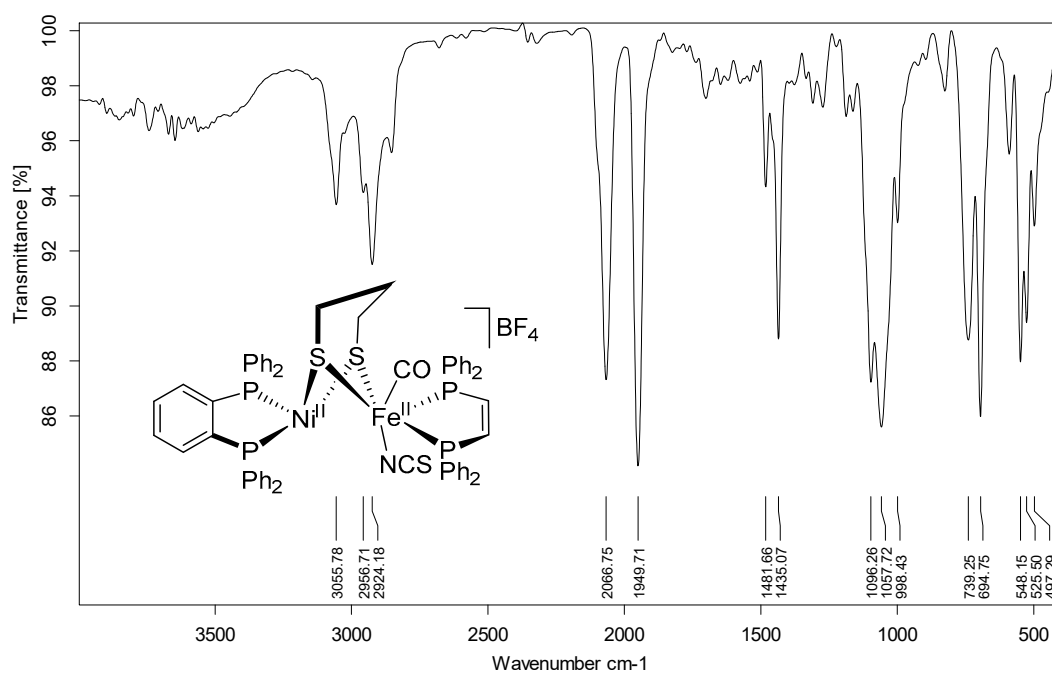

**Figure S9.** IR spectrum of  $[2]\text{BF}_4$

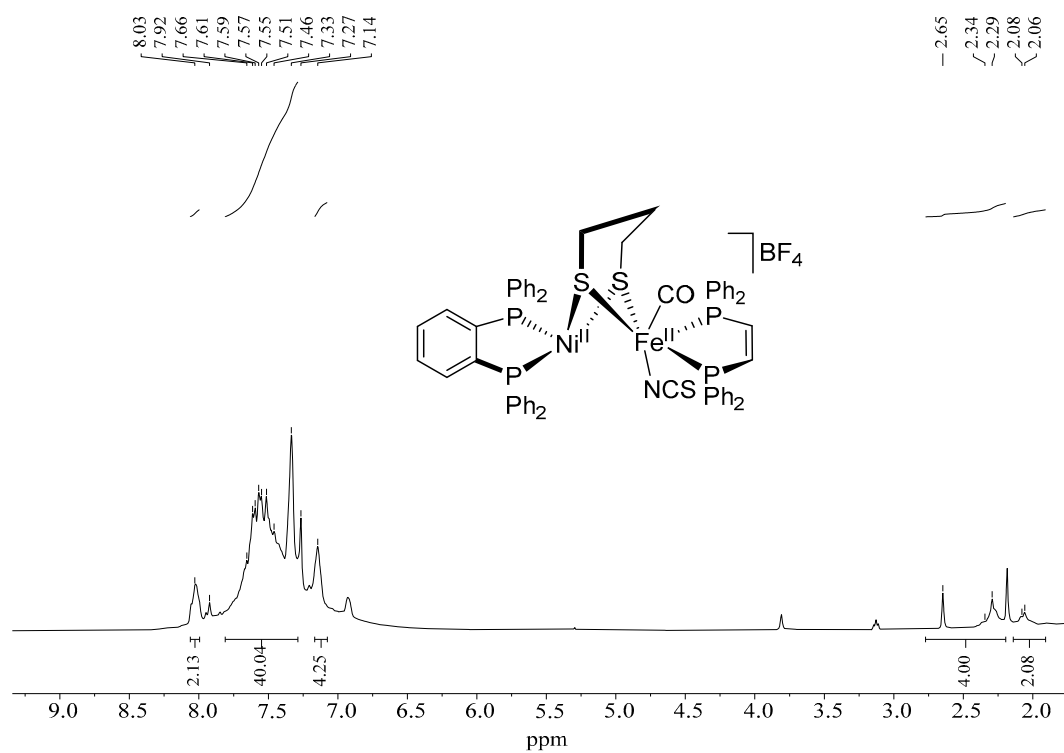

**Figure S10.**  $^1\text{H}$  NMR spectrum of  $[2]\text{BF}_4$  in  $\text{CDCl}_3$

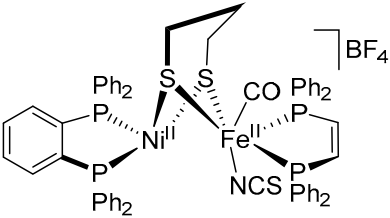

**Figure S11.**  $^{13}\text{C}$  NMR spectrum of  $[\mathbf{2}]\text{BF}_4$  in  $\text{CDCl}_3$

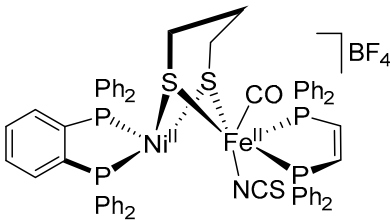

**Figure S12.**  $^{31}\text{P}$  NMR spectrum of  $[\mathbf{2}]\text{BF}_4$  in acetone- $d_6$

#### 4. IR and $^1\text{H}$ ( $^{13}\text{C}$ , $^{31}\text{P}$ ) NMR spectra of $[3]\text{BF}_4$

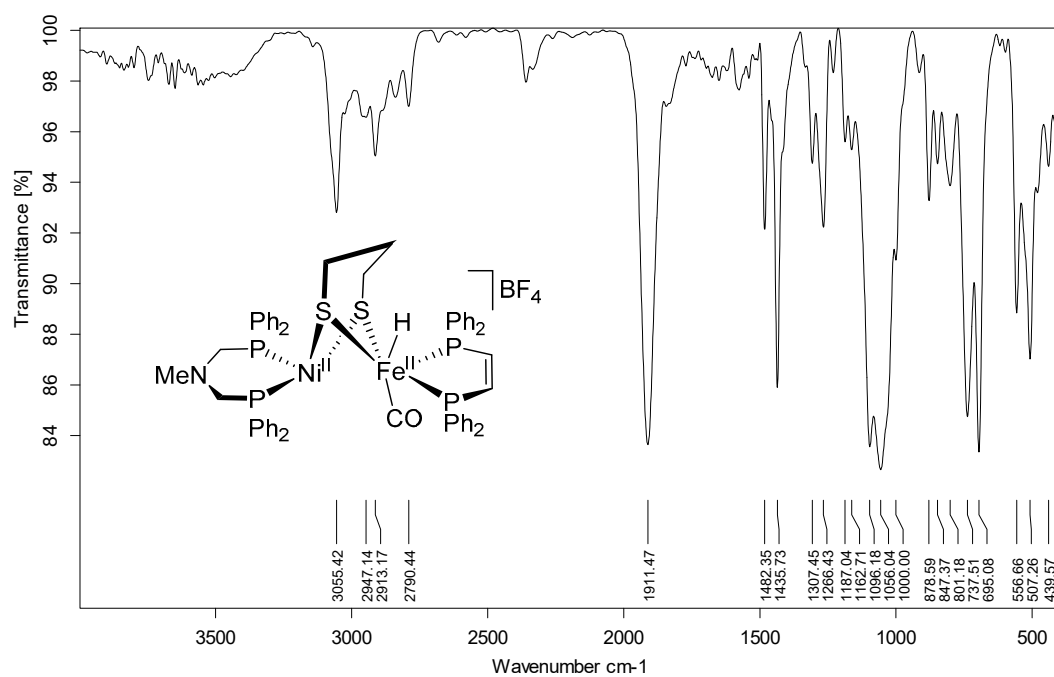

**Figure S13.** IR spectrum of  $[3]\text{BF}_4$

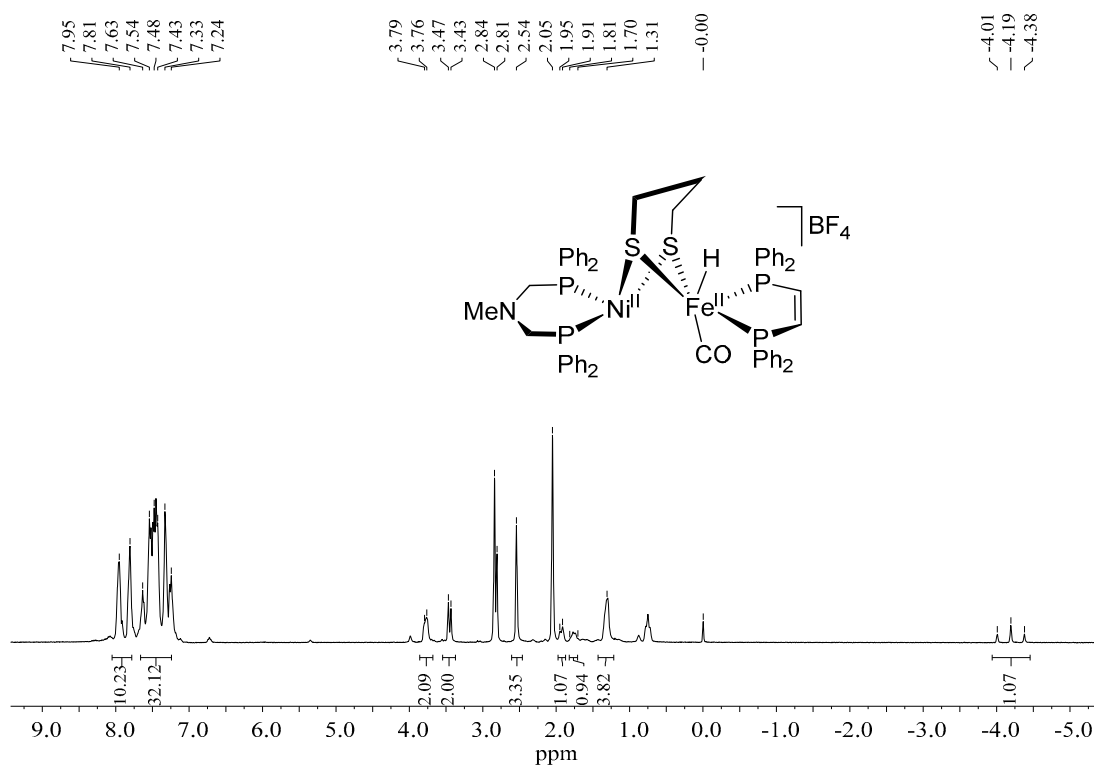

**Figure S14.**  $^1\text{H}$  NMR spectrum of  $[3]\text{BF}_4$  in acetone- $d_6$



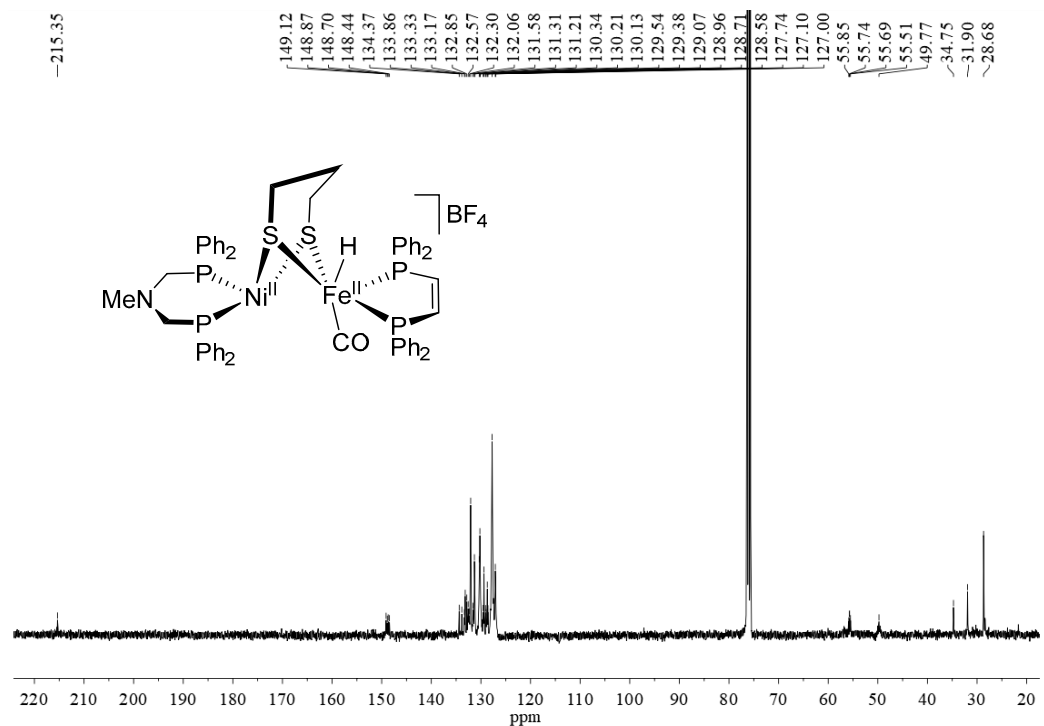

Figure S15. <sup>13</sup>C NMR spectrum of [3]BF<sub>4</sub> in CDCl<sub>3</sub>

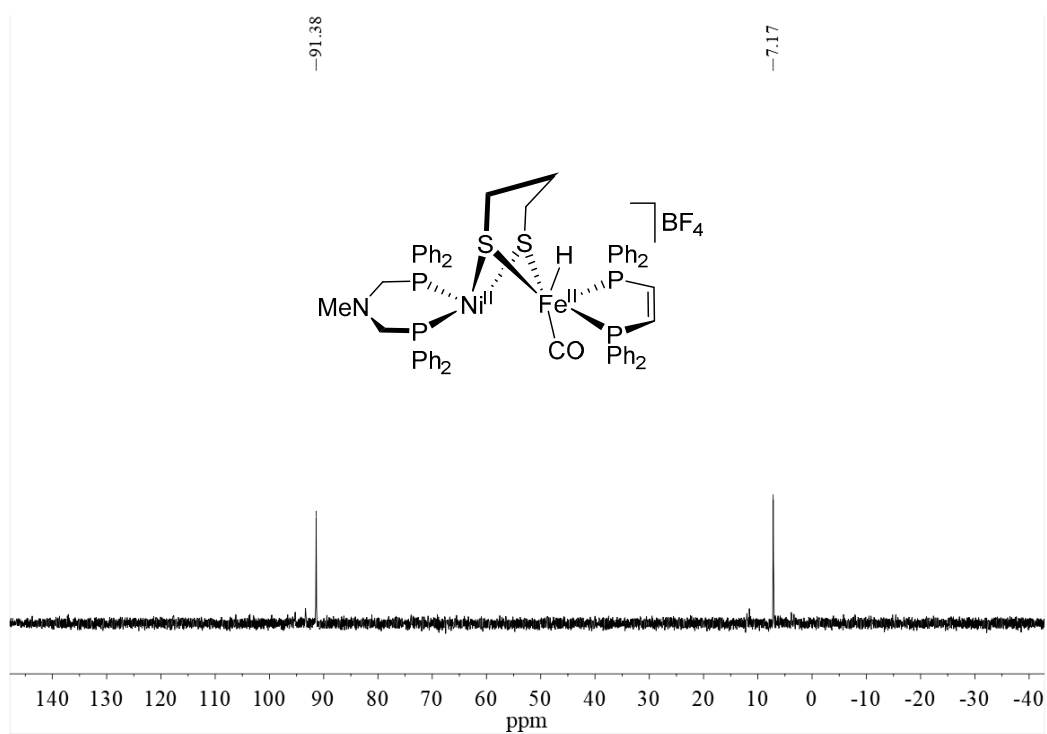

Figure S16. <sup>31</sup>P NMR spectrum of [3]BF<sub>4</sub> in CDCl<sub>3</sub>

## 5. IR and $^1\text{H}$ ( $^{13}\text{C}$ , $^{31}\text{P}$ ) NMR spectra of $[4]\text{BF}_4$

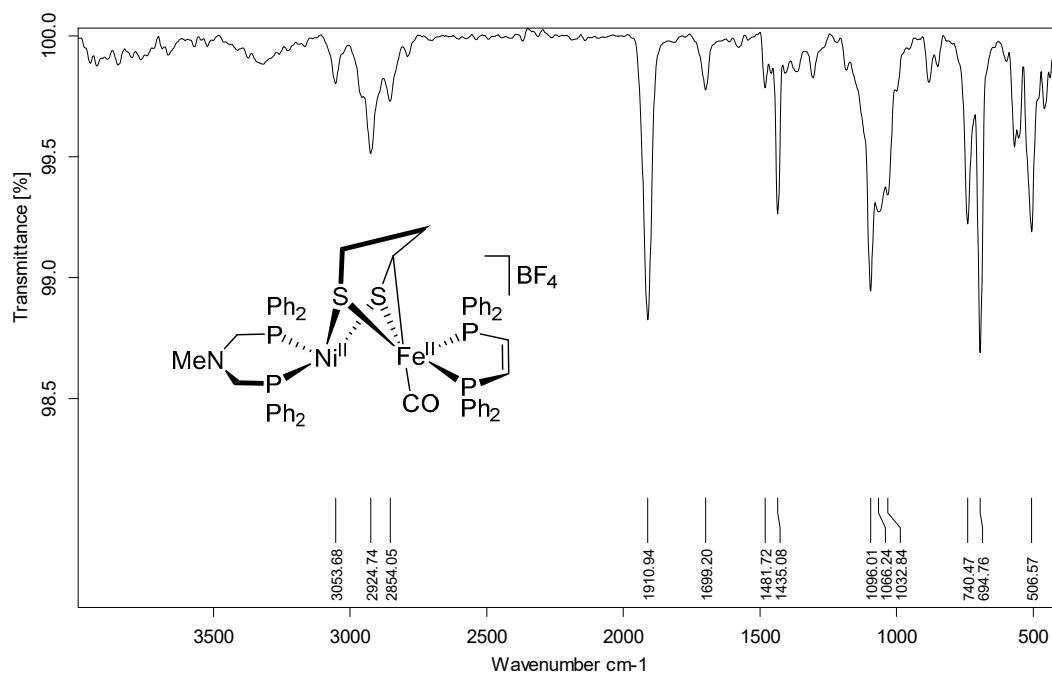

**Figure S17.** IR spectrum of  $[4]\text{BF}_4$

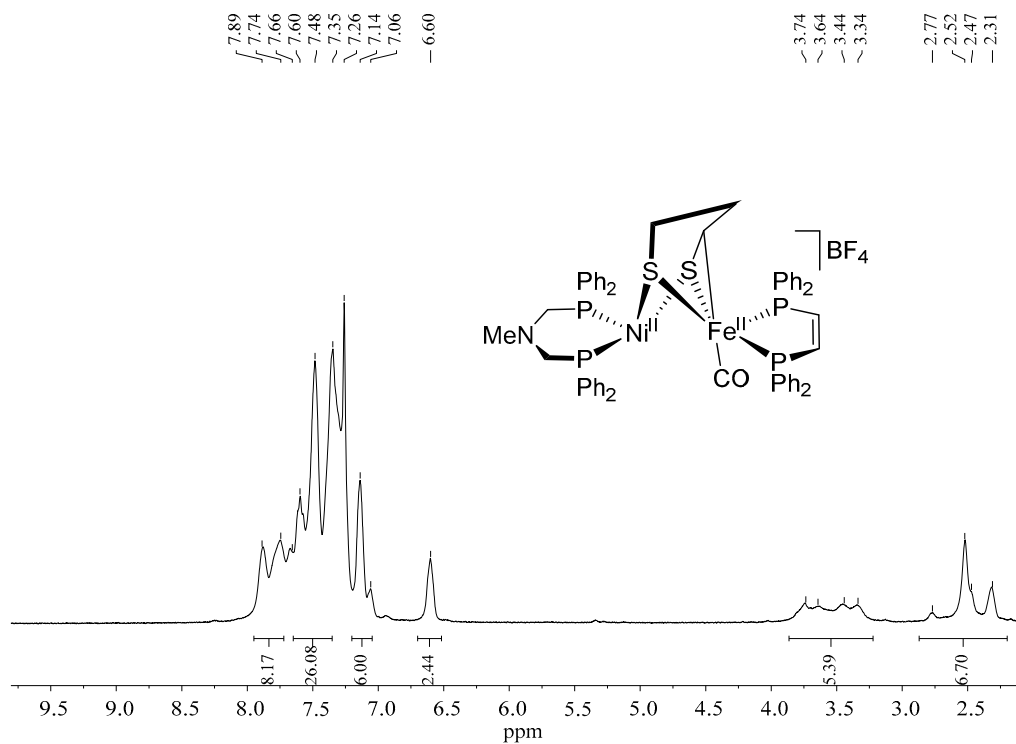

**Figure S18.**  $^1\text{H}$  NMR spectrum of  $[4]\text{BF}_4$  in  $\text{CDCl}_3$

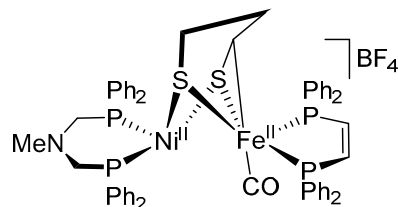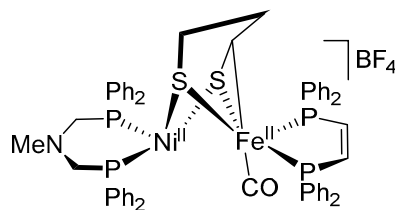

## 6. IR and $^1\text{H}$ ( $^{13}\text{C}$ , $^{31}\text{P}$ ) NMR spectra of $[\mathbf{5}]\text{BF}_4$

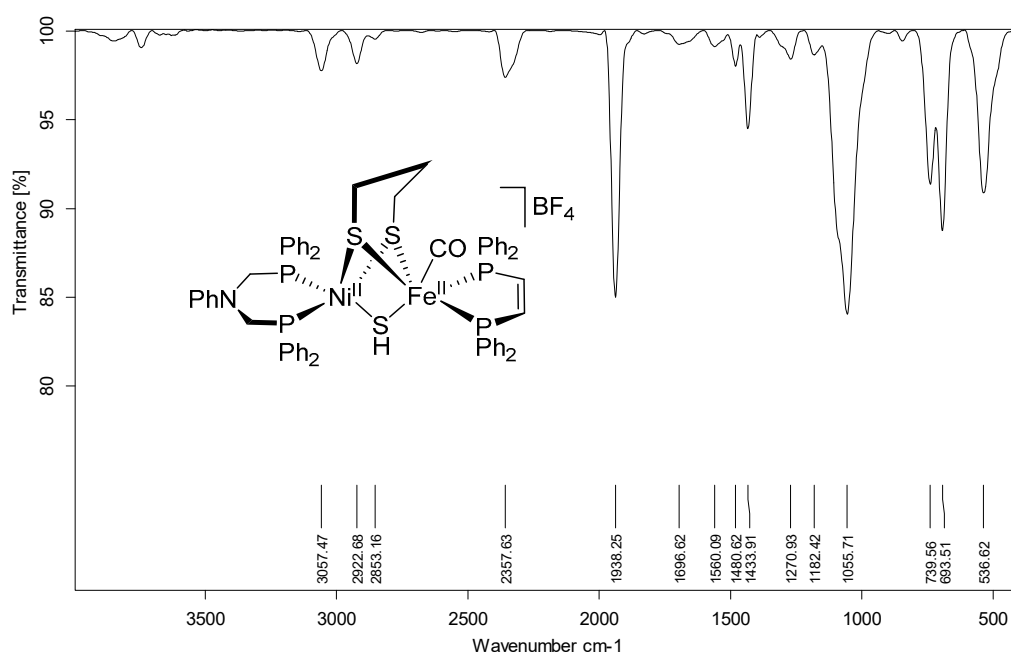

**Figure S21.** IR spectrum of  $[\mathbf{5}]\text{BF}_4$

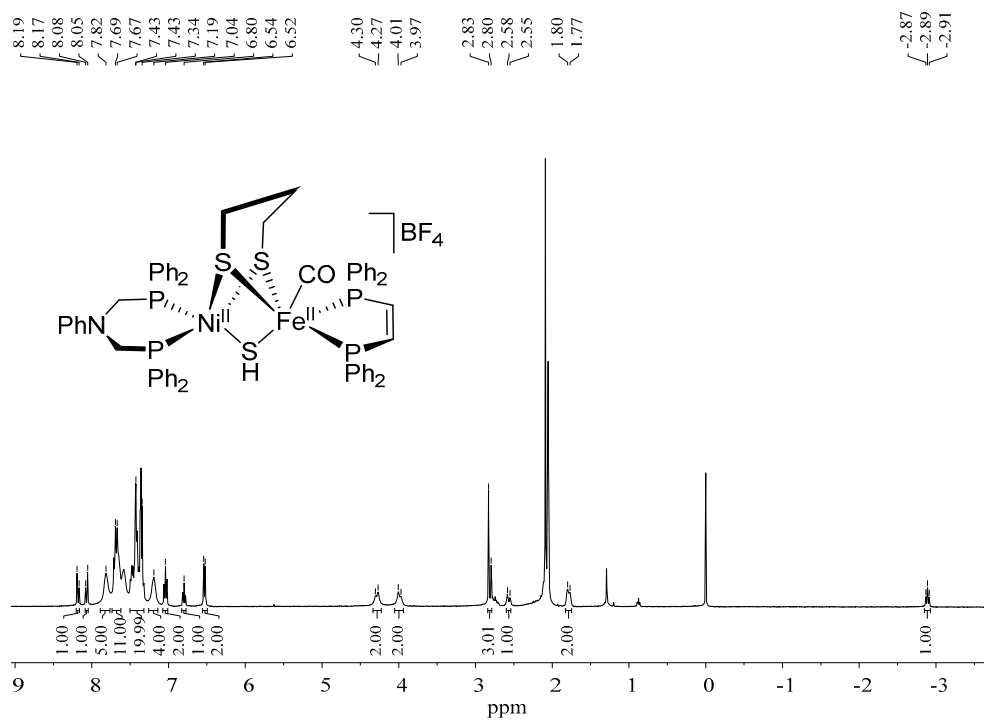

**Figure S22.**  $^1\text{H}$  NMR spectrum of  $[\mathbf{5}]\text{BF}_4$  in acetone- $d_6$

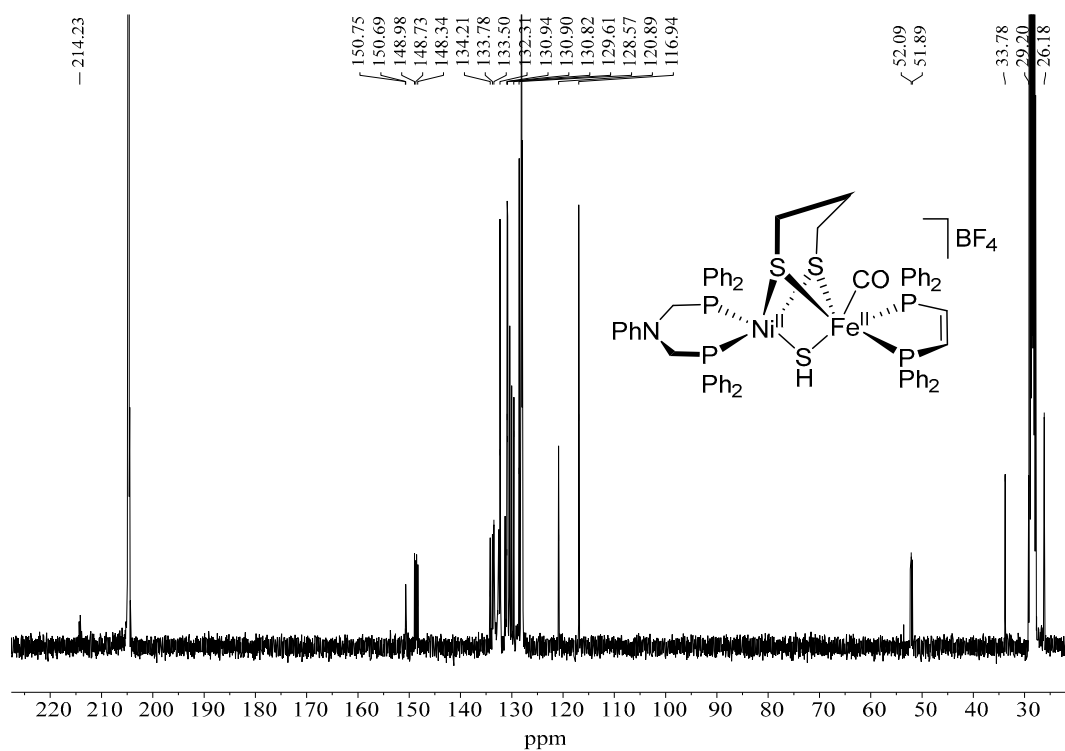

**Figure S23.** <sup>13</sup>C NMR spectrum of [5]BF<sub>4</sub> in acetone-*d*<sub>6</sub>

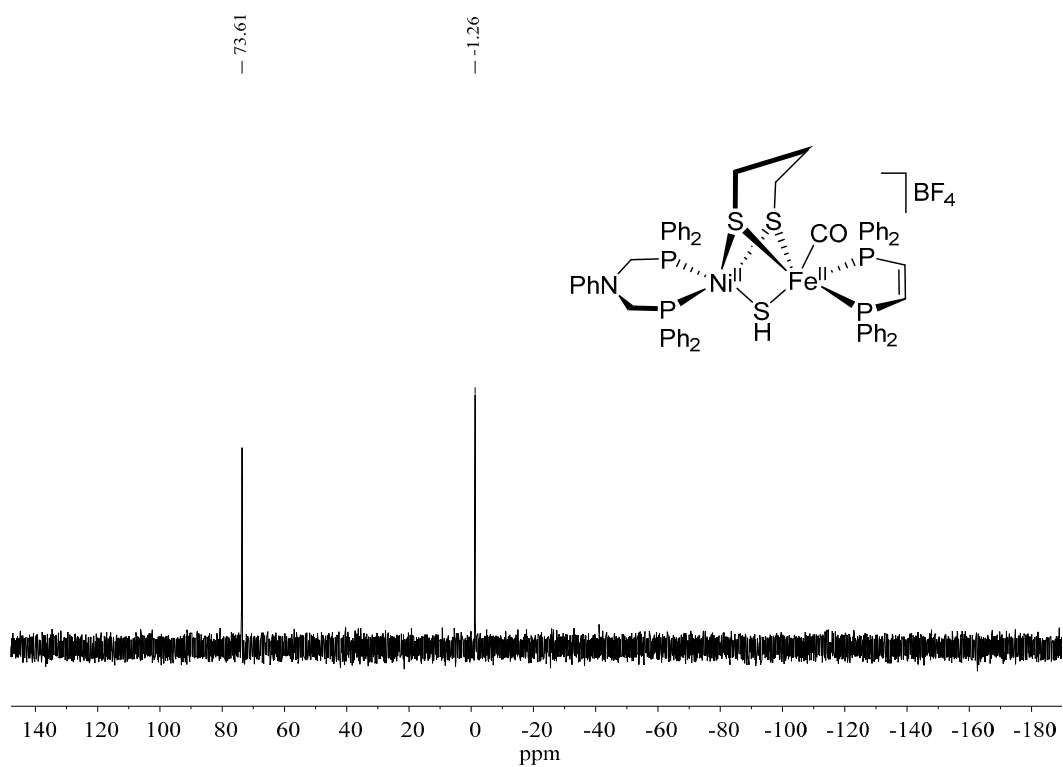

**Figure S24.** <sup>31</sup>P NMR spectrum of [5]BF<sub>4</sub> in acetone-*d*<sub>6</sub>

## 7. IR and $^1\text{H}$ ( $^{13}\text{C}$ , $^{31}\text{P}$ ) NMR spectra of $[\text{D}](\text{BF}_4)_2$

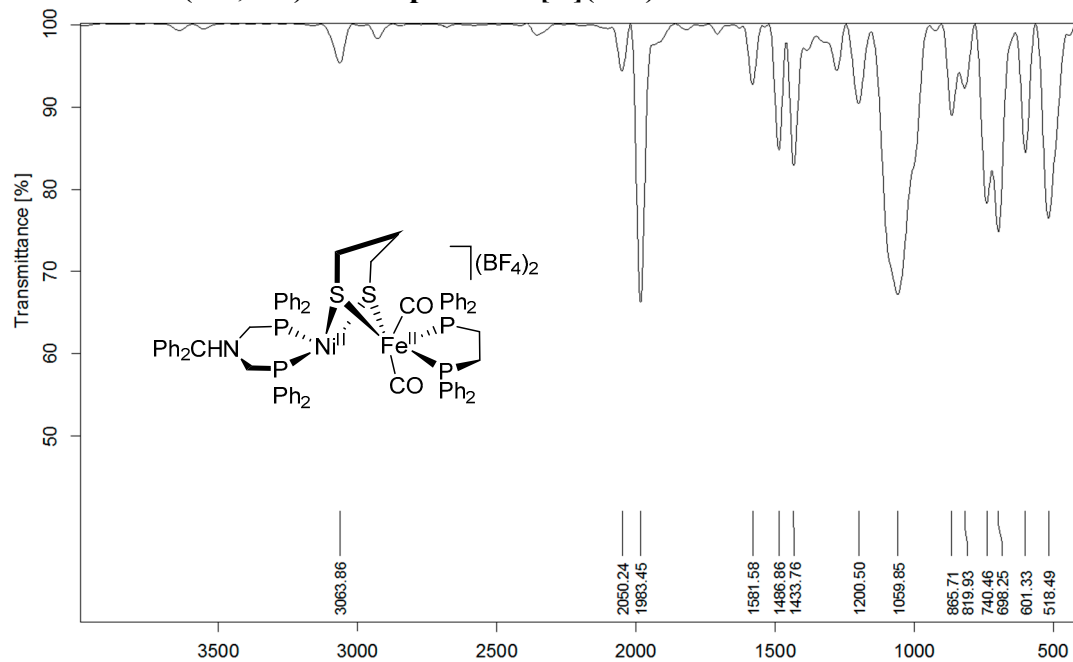

Figure S25. IR spectrum of  $[\text{D}](\text{BF}_4)_2$

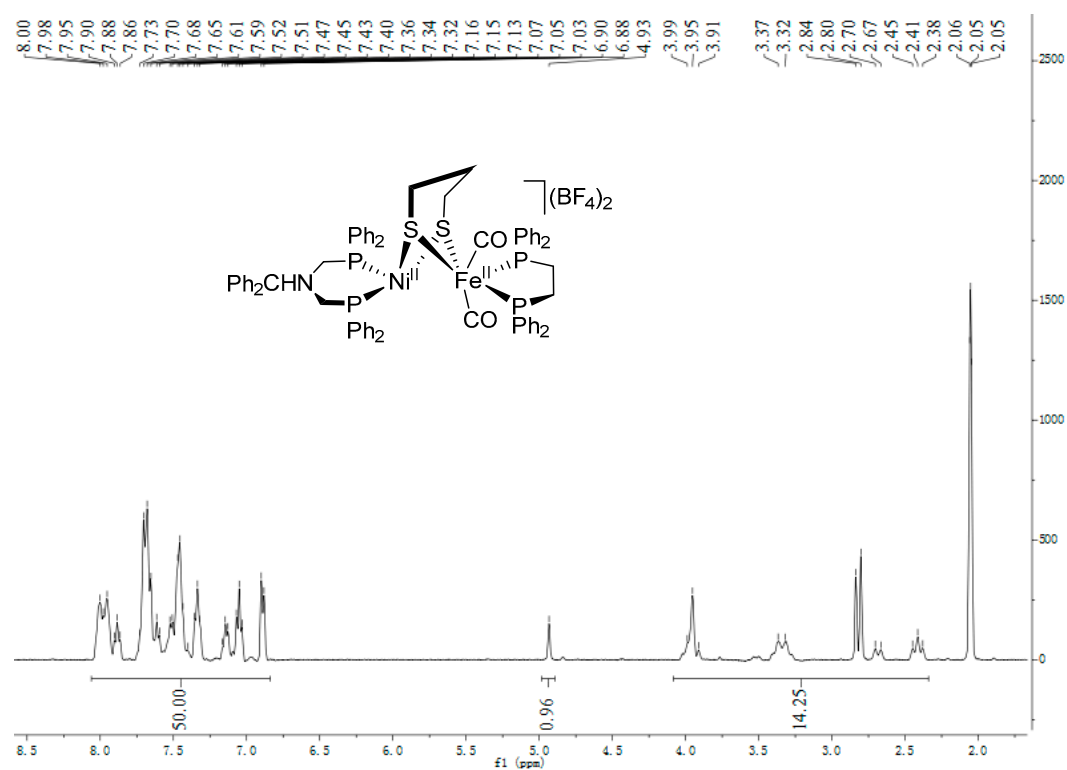

Figure S26.  $^1\text{H}$  NMR spectrum of  $[\text{D}](\text{BF}_4)_2$  in  $\text{acetone-}d_6$

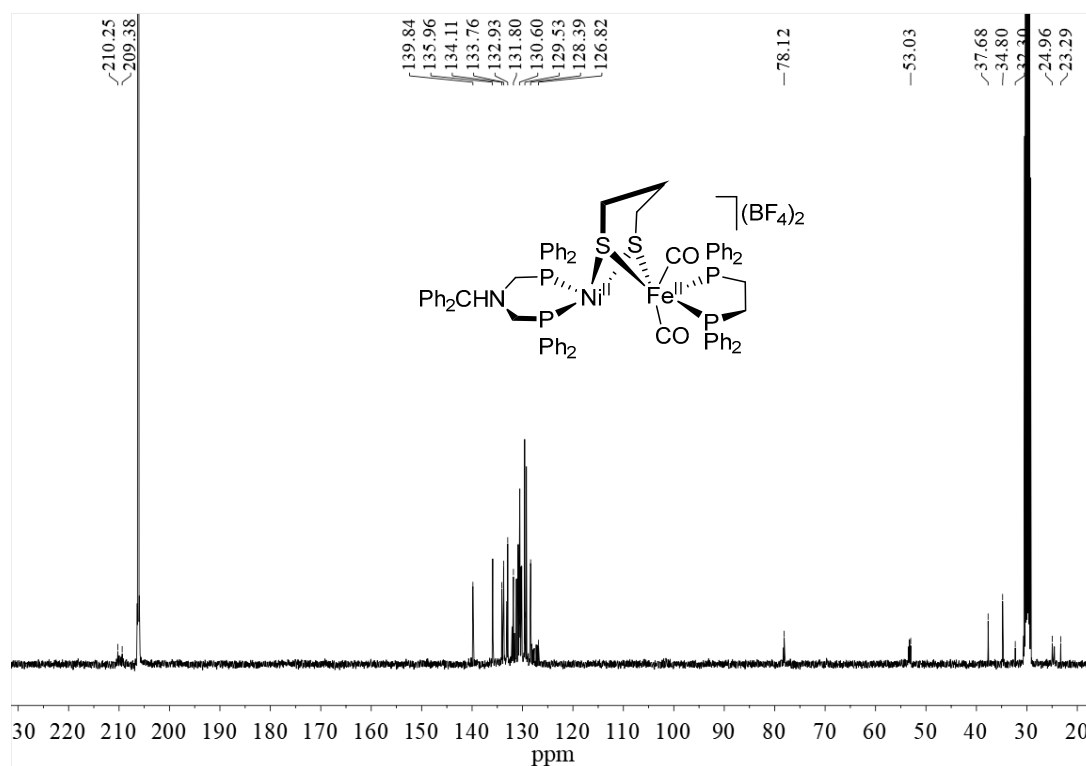

**Figure S27.**  $^{13}C$  NMR spectrum of  $[D](BF_4)_2$  in acetone- $d_6$

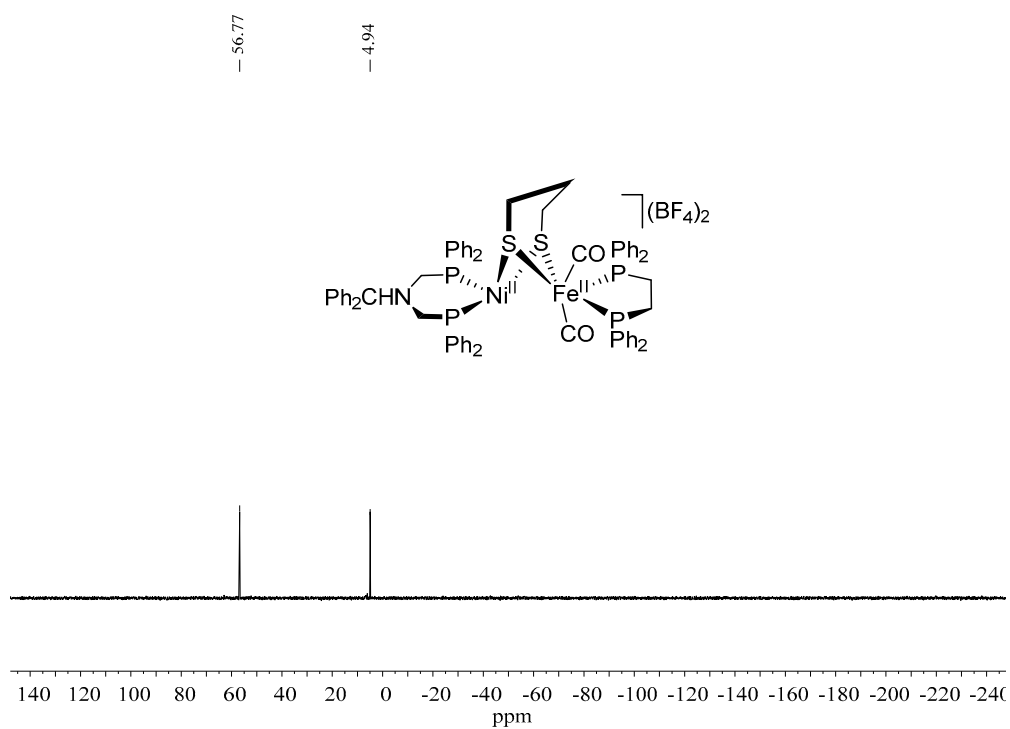

**Figure S28.**  $^{31}P$  NMR spectrum of  $[D](BF_4)_2$  in acetone- $d_6$

# 8. IR and $^1\text{H}$ ( $^{13}\text{C}$ , $^{31}\text{P}$ ) NMR spectra of $[\mathbf{6}]\text{BF}_4$

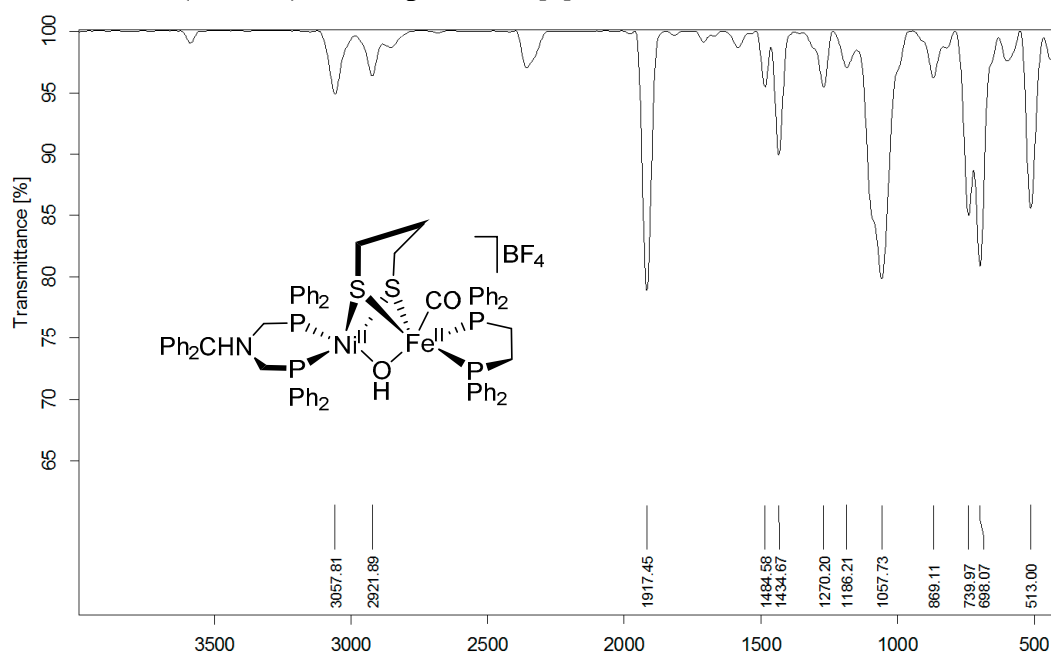

**Figure S29.** IR spectrum of  $[\mathbf{6}]\text{BF}_4$

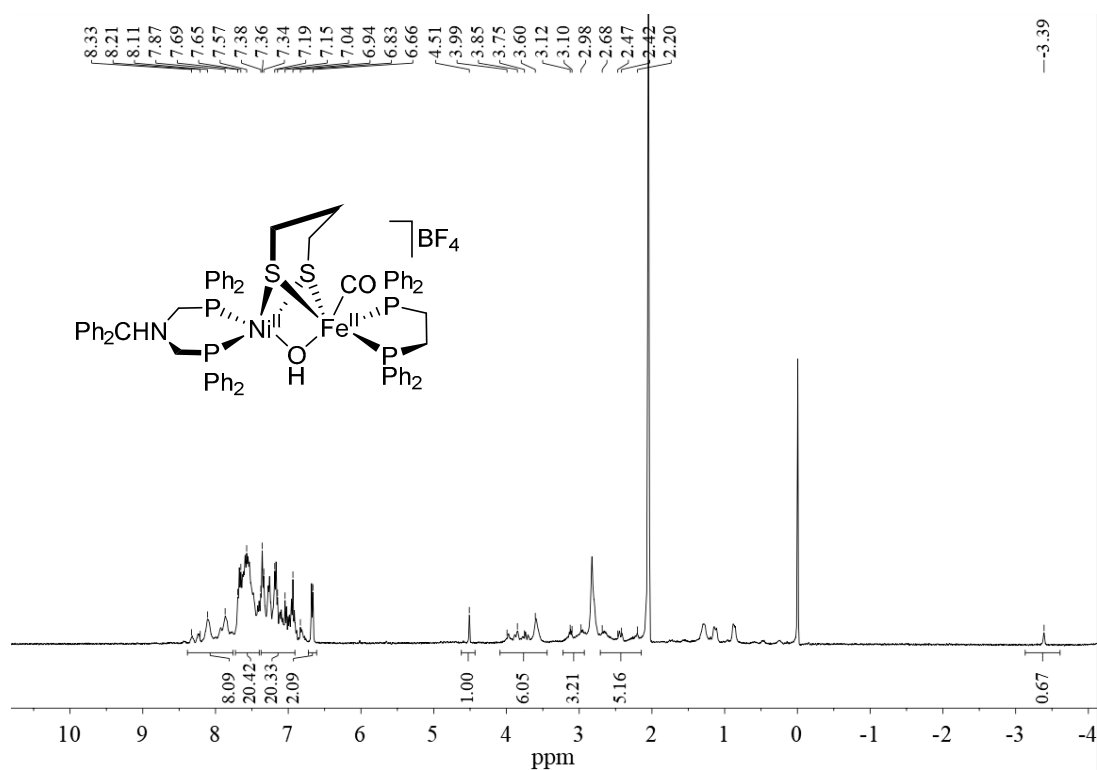

**Figure S30.**  $^1\text{H}$  NMR spectrum of  $[\mathbf{6}]\text{BF}_4$  in  $\text{acetone-}d_6$



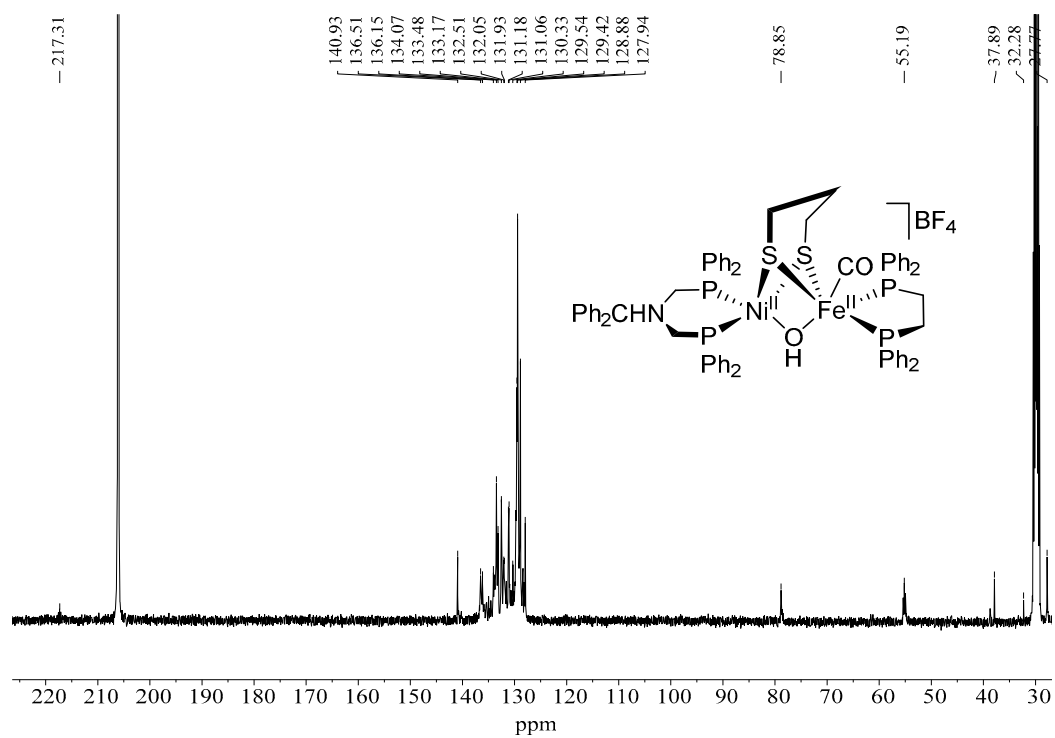

**Figure S31.** <sup>13</sup>C NMR spectrum of [6]BF<sub>4</sub> in acetone-*d*<sub>6</sub>

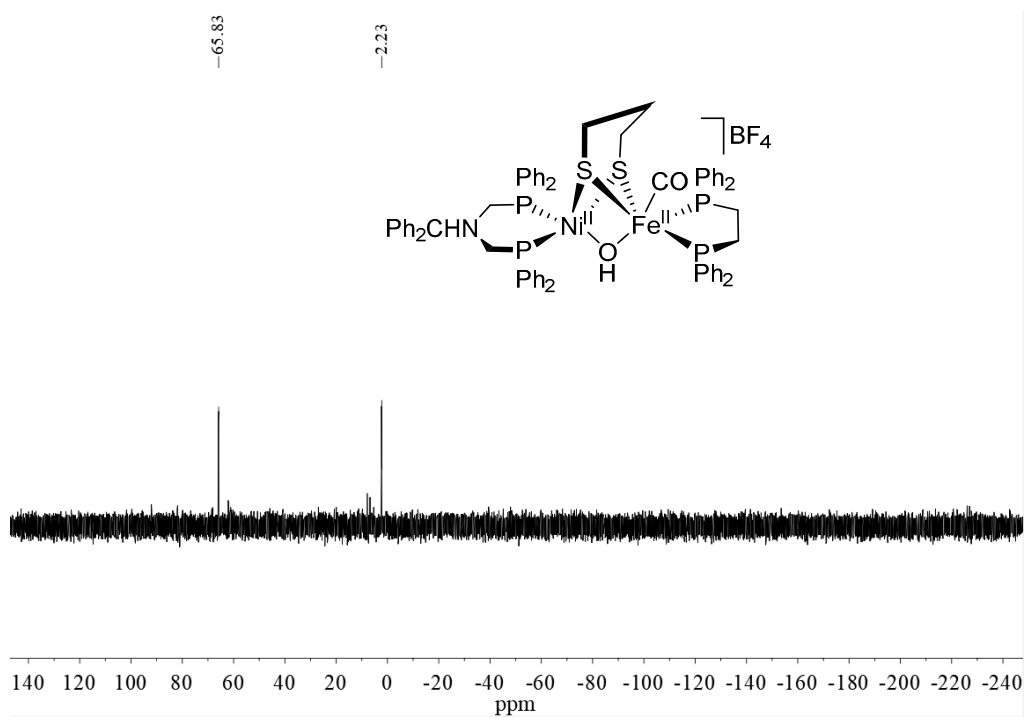

**Figure S32.** <sup>31</sup>P NMR spectrum of [6]BF<sub>4</sub> in acetone-*d*<sub>6</sub>

**9. Crystal data and structure refinement for [A](BF<sub>4</sub>)<sub>2</sub>, [1]BF<sub>4</sub>, [2]BF<sub>4</sub>, [4]BF<sub>4</sub>, [5]BF<sub>4</sub> and [D](BF<sub>4</sub>)<sub>2</sub> (Tables S1–S3)**

**Table S1.** Crystal data and structure refinement for [A](BF<sub>4</sub>)<sub>2</sub> and [1]BF<sub>4</sub>.

| Complex                                       | [A](BF <sub>4</sub> ) <sub>2</sub>                                                                                                               | [1]BF <sub>4</sub>                                                                                                                     |
|-----------------------------------------------|--------------------------------------------------------------------------------------------------------------------------------------------------|----------------------------------------------------------------------------------------------------------------------------------------|
| Empirical formula                             | C <sub>61</sub> H <sub>52</sub> B <sub>2</sub> F <sub>8</sub> FeNiO <sub>2</sub> P <sub>4</sub> S <sub>2</sub> ·2CH <sub>2</sub> Cl <sub>2</sub> | C <sub>61</sub> H <sub>52</sub> BF <sub>4</sub> FeNNiOP <sub>4</sub> S <sub>2</sub> ·CH <sub>2</sub> Cl <sub>2</sub> ·H <sub>2</sub> O |
| Formula weight                                | 1463.05                                                                                                                                          | 1307.34                                                                                                                                |
| Temperature/K                                 | 137.2(3)                                                                                                                                         | 151.6(6)                                                                                                                               |
| Crystal system                                | triclinic                                                                                                                                        | Monoclinic                                                                                                                             |
| Space group                                   | P-1                                                                                                                                              | P2 <sub>1</sub> /n                                                                                                                     |
| a/Å                                           | 13.5359(5)                                                                                                                                       | 12.16469(13)                                                                                                                           |
| b/Å                                           | 13.9046(4)                                                                                                                                       | 23.5596(3)                                                                                                                             |
| c/Å                                           | 19.5358(7)                                                                                                                                       | 20.6266(2)                                                                                                                             |
| α/°                                           | 101.369(3)                                                                                                                                       | 90                                                                                                                                     |
| β/°                                           | 92.861(3)                                                                                                                                        | 90.0624(9)                                                                                                                             |
| γ/°                                           | 114.983(3)                                                                                                                                       | 90                                                                                                                                     |
| Volume/Å <sup>3</sup>                         | 3230.6(2)                                                                                                                                        | 5911.48(11)                                                                                                                            |
| Z                                             | 2                                                                                                                                                | 4                                                                                                                                      |
| ρ <sub>calc</sub> /g·cm <sup>-3</sup>         | 1.504                                                                                                                                            | 1.469                                                                                                                                  |
| μ/mm <sup>-1</sup>                            | 5.792                                                                                                                                            | 5.354                                                                                                                                  |
| F(000)                                        | 1492.0                                                                                                                                           | 2688.0                                                                                                                                 |
| Crystal size/mm <sup>3</sup>                  | 0.150 × 0.140 × 0.120                                                                                                                            | 0.160 × 0.140 × 0.120                                                                                                                  |
| Radiation                                     | CuKα (λ = 1.54184)                                                                                                                               | CuKα (λ = 1.54184)                                                                                                                     |
| 2θ range for data collection/°                | 7.2268 to 148.1318                                                                                                                               | 7.504 to 134.152                                                                                                                       |
| Index ranges                                  | -16 ≤ h ≤ 15, -16 ≤ k ≤ 16, -23 ≤ l ≤ 22                                                                                                         | -14 ≤ h ≤ 14, -28 ≤ k ≤ 23, -22 ≤ l ≤ 24                                                                                               |
| Reflections collected                         | 23359                                                                                                                                            | 40305                                                                                                                                  |
| Independent reflections                       | 11539 [R <sub>int</sub> = 0.0419, R <sub>sigma</sub> = 0.0575]                                                                                   | 10570 [R <sub>int</sub> = 0.0563, R <sub>sigma</sub> = 0.0465]                                                                         |
| Data/restraints/parameters                    | 11539/134/807                                                                                                                                    | 10570/9/729                                                                                                                            |
| Goodness-of-fit on F <sup>2</sup>             | 1.028                                                                                                                                            | 1.019                                                                                                                                  |
| Final R indexes [I ≥ 2σ (I)]                  | R <sub>1</sub> = 0.0622, wR <sub>2</sub> = 0.1600                                                                                                | R <sub>1</sub> = 0.0425, wR <sub>2</sub> = 0.1032                                                                                      |
| Final R indexes [all data]                    | R <sub>1</sub> = 0.0735, wR <sub>2</sub> = 0.1706                                                                                                | R <sub>1</sub> = 0.0524, wR <sub>2</sub> = 0.1099                                                                                      |
| Largest diff. peak and hole/e Å <sup>-3</sup> | 2.15 and -1.39                                                                                                                                   | 1.66 and -1.07                                                                                                                         |

**Table S2.** Crystal data and structure refinement for [2]BF<sub>4</sub> and [4]BF<sub>4</sub>.

| Complex                                          | [2]BF <sub>4</sub>                                                                  | [4]BF <sub>4</sub>                                                                                                      |
|--------------------------------------------------|-------------------------------------------------------------------------------------|-------------------------------------------------------------------------------------------------------------------------|
| Empirical formula                                | C <sub>61</sub> H <sub>52</sub> BF <sub>4</sub> FeNNiOP <sub>4</sub> S <sub>3</sub> | C <sub>57</sub> H <sub>54</sub> BF <sub>4</sub> FeNNiOP <sub>4</sub> S <sub>2</sub> ·2(C <sub>3</sub> H <sub>6</sub> O) |
| Formula weight                                   | 1236.46                                                                             | 1274.53                                                                                                                 |
| Temperature/K                                    | 152(2)                                                                              | 100.00(10)                                                                                                              |
| Crystal system                                   | triclinic                                                                           | Triclinic                                                                                                               |
| Space group                                      | P-1                                                                                 | P-1                                                                                                                     |
| a/Å                                              | 13.6077(9)                                                                          | 10.4504(3)                                                                                                              |
| b/Å                                              | 13.8784(10)                                                                         | 17.3852(6)                                                                                                              |
| c/Å                                              | 20.6526(15)                                                                         | 17.3954(6)                                                                                                              |
| $\alpha$ /°                                      | 70.414(7)                                                                           | 85.080(3)                                                                                                               |
| $\beta$ /°                                       | 87.819(6)                                                                           | 81.056(3)                                                                                                               |
| $\gamma$ /°                                      | 74.103(6)                                                                           | 75.973(3)                                                                                                               |
| Volume/Å <sup>3</sup>                            | 3527.9(5)                                                                           | 3025.10(18)                                                                                                             |
| Z                                                | 2                                                                                   | 2                                                                                                                       |
| $\rho_{\text{calc}}/\text{g}\cdot\text{cm}^{-3}$ | 1.164                                                                               | 1.399                                                                                                                   |
| $\mu/\text{mm}^{-1}$                             | 4.037                                                                               | 4.433                                                                                                                   |
| F(000)                                           | 1272.0                                                                              | 1324.0                                                                                                                  |
| Crystal size/mm <sup>3</sup>                     | 0.150 × 0.140 × 0.130                                                               | 0.160 × 0.140 × 0.120                                                                                                   |
| Radiation                                        | CuK $\alpha$ ( $\lambda$ = 1.54184)                                                 | CuK $\alpha$ ( $\lambda$ = 1.54184)                                                                                     |
| 2 $\theta$ range for data collection/°           | 7.036 to 134.144                                                                    | 7.166 to 134.154                                                                                                        |
| Index ranges                                     | -16 ≤ h ≤ 16, -16 ≤ k ≤ 16, -20 ≤ l ≤ 24                                            | -12 ≤ h ≤ 12, -19 ≤ k ≤ 20, -20 ≤ l ≤ 16                                                                                |
| Reflections collected                            | 22648                                                                               | 20587                                                                                                                   |
| Independent reflections                          | 12095 [R <sub>int</sub> = 0.0948, R <sub>sigma</sub> = 0.1438]                      | 10804 [R <sub>int</sub> = 0.0696, R <sub>sigma</sub> = 0.0895]                                                          |
| Data/restraints/parameters                       | 12095/64/695                                                                        | 10804/12/726                                                                                                            |
| Goodness-of-fit on F <sup>2</sup>                | 0.880                                                                               | 1.039                                                                                                                   |
| Final R indexes [I ≥ 2 $\sigma$ (I)]             | R <sub>1</sub> = 0.0790, wR <sub>2</sub> = 0.1944                                   | R <sub>1</sub> = 0.0705, wR <sub>2</sub> = 0.1765                                                                       |
| Final R indexes [all data]                       | R <sub>1</sub> = 0.1375, wR <sub>2</sub> = 0.2390                                   | R <sub>1</sub> = 0.0897, wR <sub>2</sub> = 0.1968                                                                       |
| Largest diff. peak and hole/e Å <sup>-3</sup>    | 1.16 and -0.67                                                                      | 1.42 and -0.76                                                                                                          |

**Table S3.** Crystal data and structure refinement for **[5]BF<sub>4</sub>** and **[D](BF<sub>4</sub>)<sub>2</sub>**.

| Complex                                       | <b>[5]BF<sub>4</sub></b>                                                                                                  | <b>[D](BF<sub>4</sub>)<sub>2</sub></b>                                                                                                               |
|-----------------------------------------------|---------------------------------------------------------------------------------------------------------------------------|------------------------------------------------------------------------------------------------------------------------------------------------------|
| Empirical formula                             | C <sub>62</sub> H <sub>58</sub> BF <sub>4</sub> FeNNiOP <sub>4</sub> S <sub>3</sub> ·0.5(C <sub>6</sub> H <sub>14</sub> ) | C <sub>70</sub> H <sub>65</sub> B <sub>2</sub> F <sub>8</sub> FeNNiO <sub>2</sub> P <sub>4</sub> S <sub>2</sub> ·4(CH <sub>2</sub> Cl <sub>2</sub> ) |
| Formula weight                                | 1297.61                                                                                                                   | 1768.10                                                                                                                                              |
| Temperature/K                                 | 293(2)                                                                                                                    | 113                                                                                                                                                  |
| Crystal system                                | trigonal                                                                                                                  | monoclinic                                                                                                                                           |
| Space group                                   | P-3                                                                                                                       | P2 <sub>1</sub> /c                                                                                                                                   |
| a/Å                                           | 26.3215(7)                                                                                                                | 16.1180(9)                                                                                                                                           |
| b/Å                                           | 26.3215(7)                                                                                                                | 24.5373(12)                                                                                                                                          |
| c/Å                                           | 19.6548(5)                                                                                                                | 22.9864(14)                                                                                                                                          |
| α/°                                           | 90                                                                                                                        | 90                                                                                                                                                   |
| β/°                                           | 90                                                                                                                        | 108.562(2)                                                                                                                                           |
| γ/°                                           | 120                                                                                                                       | 90                                                                                                                                                   |
| Volume/Å <sup>3</sup>                         | 11792.9(7)                                                                                                                | 8618.0(8)                                                                                                                                            |
| Z                                             | 6                                                                                                                         | 4                                                                                                                                                    |
| ρ <sub>cal</sub> /g·cm <sup>-3</sup>          | 1.096                                                                                                                     | 1.412                                                                                                                                                |
| μ/mm <sup>-1</sup>                            | 3.642                                                                                                                     | 0.820                                                                                                                                                |
| F(000)                                        | 4038.0                                                                                                                    | 3728.0                                                                                                                                               |
| Crystal size/mm <sup>3</sup>                  | 0.210 × 0.200 × 0.190                                                                                                     | 0.150 × 0.130 × 0.110                                                                                                                                |
| Radiation                                     | CuKα (λ = 1.54184)                                                                                                        | MoKα (λ = 0.71073)                                                                                                                                   |
| 2θ range for data collection/°                | 7.756 to 148.056                                                                                                          | 6.05 to 50.04                                                                                                                                        |
| Index ranges                                  | -31 ≤ h ≤ 23, -31 ≤ k ≤ 30, -24 ≤ l ≤ 18                                                                                  | -19 ≤ h ≤ 18, -27 ≤ k ≤ 29, -27 ≤ l ≤ 27                                                                                                             |
| Reflections collected                         | 29801                                                                                                                     | 73887                                                                                                                                                |
| Independent reflections                       | 15472 [R <sub>int</sub> = 0.0740, R <sub>sigma</sub> = 0.1049]                                                            | 15107 [R <sub>int</sub> = 0.0348, R <sub>sigma</sub> = 0.0244]                                                                                       |
| Data/restraints/parameters                    | 15472/122/787                                                                                                             | 15107/0/928                                                                                                                                          |
| Goodness-of-fit on F <sup>2</sup>             | 0.903                                                                                                                     | 0.896                                                                                                                                                |
| Final R indexes [I ≥ 2σ (I)]                  | R <sub>1</sub> = 0.0689, wR <sub>2</sub> = 0.1841                                                                         | R <sub>1</sub> = 0.0539, wR <sub>2</sub> = 0.1480                                                                                                    |
| Final R indexes [all data]                    | R <sub>1</sub> = 0.0834, wR <sub>2</sub> = 0.1981                                                                         | R <sub>1</sub> = 0.0624, wR <sub>2</sub> = 0.1563                                                                                                    |
| Largest diff. peak and hole/e Å <sup>-3</sup> | 1.28 and -0.59                                                                                                            | 1.61 and -1.37                                                                                                                                       |
